# Supplementary material for: Nonbenzenoid aromaticity of 1-phosphafulvenes: synthesis of phosphacymantrenes
Source: Royal Society of Chemistry journal article supplement (doi:10.1039/d0dt03934a), 2020-12-11
Supplement: d0dt03934a1.pdf [file d0dt03934a1.pdf]

## Supporting Information

### **Nonbenzenoid Aromaticity of 1-Phosphafulvenes: Synthesis of Phosphacymantrene**

Yanjie Liu, Rongqiang Tian,\* Zheng Duan,\* François Mathey

*College of Chemistry, Green Catalysis Center, International Phosphorus Laboratory,  
International Joint Research Laboratory for Functional Organophosphorus Materials  
of Henan Province, Zhengzhou University, Zhengzhou 450001, P. R. China*

\*E-mail: tianrq@zzu.edu.cn (R. Tian).

\*E-mail: duanzheng@zzu.edu.cn (Z. Duan).

## Table of Contents

|                                                            |     |
|------------------------------------------------------------|-----|
| General information.....                                   | s3  |
| Experimental Procedures and Characterization Data.....     | s3  |
| X-ray crystallographic studies of compound <b>5a</b> ..... | s9  |
| X-ray crystallographic studies of compound <b>5b</b> ..... | s13 |
| X-ray crystallographic studies of compound <b>7b</b> ..... | s17 |
| X-ray crystallographic studies of compound <b>8a</b> ..... | s21 |
| X-ray crystallographic studies of compound <b>9</b> .....  | s25 |
| NMR spectrums.....                                         | s30 |

## General information

All reactions were performed under nitrogen using solvents dried by standard methods. NMR spectra were obtained using Bruker AV300 spectrometer. All spectra were recorded in CDCl<sub>3</sub>. All coupling constants (*J* values) were reported in hertz (Hz). Chemical shifts were expressed in parts per million (ppm) downfield from internal TMS (<sup>1</sup>H). HRMS spectra were obtained on an Agilent 1290-6540 UHPLC Q-ToF HRMS spectrometer. UV-Visible spectra were recorded at room temperature on a VARIAN Cary 5000 spectrophotometer. X-ray crystallographic analyses were performed on an Oxford diffraction Gemini E diffractometer. Melting Point: heating rate: 4°C/min, the thermometer was not corrected. Silica gel (200-300 mesh) was used for the chromatographic separations. All commercially available reagents were used without further purification. All new compounds were synthetic in small scale, and were purified by column chromatography. Compound **2** and **6a** (Hu, Z.; Li, Z.; Zhao, K.; Tian, R.; Duan, Z.; Mathey, F. *Org. Lett.* **2015**, *17*, 3518.) and **6b** (Y. Liu, K. Zhang, R. Tian, Z. Duan, F. Mathey, *Org. Lett.* **2020**, *22*, 6972) were prepared according to literature method. The purities of the new compounds are acceptable according to NMR spectra analysis.

## Experimental Procedures and Characterization Data

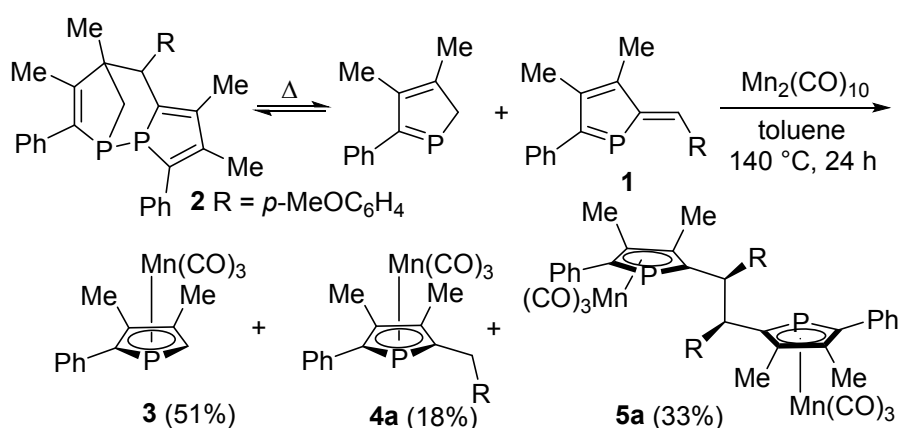

A solution of **2** (247 mg, 0.5 mmol) and Mn<sub>2</sub>(CO)<sub>10</sub> (198 mg, 0.5 mmol) in toluene (5 mL) was stirred at 140 °C in oil bath for 24 h in a pressure tube (filled with nitrogen). The resulting solution was evaporated to dryness and the crude product was

purified by column chromatography (silica gel, Petroleum ether/Ethyl acetate = 20:1) providing 84 mg of **3** (Mercier, F.; Holand, S.; Mathey, F. Synthesis and some reactions of a 2,2'-biphospholyl. *J. Organomet. Chem.* **1986**, *316*, 271-279.) as yellow solid (0.26 mmol, 51%,  $R_f = 0.65$ ), 40 mg of **4a** as colourless oil (0.09 mmol, 18%,  $R_f = 0.50$ ) and 72 mg of **5a** as yellow solid (0.08 mmol, 33%,  $R_f = 0.35$ ). The single crystal of **5a** was grown from a mixture of DCM and MeOH.

**3**:  $^{31}\text{P}$  NMR ( $\text{CDCl}_3$ , 121 MHz):  $\delta$  -35.8.  $^1\text{H}$  NMR ( $\text{CDCl}_3$ , 300 MHz):  $\delta$  2.14 (s, 3H,  $\text{CH}_3$ ), 2.19 (s, 3H,  $\text{CH}_3$ ), 4.37-4.59 (m, 1H, CH), 7.18-7.27 (m, 5H, Ph).  $^{13}\text{C}\{^1\text{H}\}$  NMR ( $\text{CDCl}_3$ , 75 MHz):  $\delta$  13.4 (s,  $\text{CH}_3$ ), 16.1 (s,  $\text{CH}_3$ ), 95.3 (d,  $J_{\text{CP}} = 63.0$  Hz, CH-P), 110.1 (d,  $J_{\text{CP}} = 7.5$  Hz, C-Me), 111.8 (d,  $J_{\text{CP}} = 3.8$  Hz, C-Me), 120.0 (d,  $J_{\text{CP}} = 57.8$  Hz, C-P), 127.9 (s, Ph CH), 128.3 (s, Ph CH), 130.3 (d,  $J_{\text{CP}} = 6.7$  Hz, Ph CH), 135.0 (d,  $J_{\text{CP}} = 17.3$  Hz, Ph C), 224.1 (s, CO).

**4a**: colourless oil.  $^{31}\text{P}$  NMR ( $\text{CDCl}_3$ , 121 MHz):  $\delta$  -29.5.  $^1\text{H}$  NMR ( $\text{CDCl}_3$ , 300 MHz):  $\delta$  2.14 (s, 6H,  $\text{CH}_3$ ), 3.40-3.49 (m, 2H,  $\text{CH}_2$ ), 3.79 (s, 3H,  $\text{OCH}_3$ ), 6.85-6.88 (m, 2H, CH), 7.16-7.25 (m, 7H, CH).  $^{13}\text{C}\{^1\text{H}\}$  NMR ( $\text{CDCl}_3$ , 75 MHz):  $\delta$  13.5 (s,  $\text{CH}_3$ ), 14.0 (s,  $\text{CH}_3$ ), 34.4 (d,  $J_{\text{CP}} = 18.0$  Hz,  $\text{CH}_2$ ), 55.3 (s,  $\text{OCH}_3$ ), 107.1 (d,  $J_{\text{CP}} = 6.0$  Hz, C-Me), 112.5 (d,  $J_{\text{CP}} = 4.5$  Hz, C-Me), 114.0 (s, Ph CH), 115.7 (d,  $J_{\text{CP}} = 57.0$  Hz, C-P), 119.4 (d,  $J_{\text{CP}} = 60.8$  Hz, C-P), 127.8 (s, Ph CH), 128.2 (s, Ph CH), 129.7 (d,  $J_{\text{CP}} = 2.2$  Hz, Ph CH), 130.5 (d,  $J_{\text{CP}} = 6.0$  Hz, Ph CH), 131.9 (d,  $J_{\text{CP}} = 2.3$  Hz, Ph C), 134.6 (d,  $J_{\text{CP}} = 17.3$  Hz, Ph C), 158.4 (s, Ph C), 224.3 (s, CO). HRMS (ESI)  $m/z$ :  $[\text{M}+\text{H}]^+$  calcd for  $\text{C}_{23}\text{H}_{21}\text{MnO}_4\text{P}$  447.0552; Found 447.0557. IR (neat)  $\delta$  2009.98, 1930.91  $\text{cm}^{-1}$ .

**5a**: yellow solid, m.p.  $>250$  °C.  $^{31}\text{P}$  NMR ( $\text{CDCl}_3$ , 121 MHz):  $\delta$  -25.0.  $^1\text{H}$  NMR ( $\text{CDCl}_3$ , 300 MHz):  $\delta$  2.03 (s, 6H,  $\text{CH}_3$ ), 2.05 (s, 6H,  $\text{CH}_3$ ), 3.79 (s, 6H,  $\text{OCH}_3$ ), 4.04 (d,  $J = 12.9$  Hz, 2H, CH), 6.74-6.76 (m, 4H, CH), 7.09-7.12 (m, 5H, CH), 7.24-7.26 (m, 9H, CH).  $^{13}\text{C}\{^1\text{H}\}$  NMR ( $\text{CDCl}_3$ , 75 MHz):  $\delta$  13.9 (s,  $\text{CH}_3$ ), 14.1 (s,  $\text{CH}_3$ ), 50.8 (d,  $J_{\text{CP}} = 9.0$  Hz, CH), 55.2 (s,  $\text{OCH}_3$ ), 108.8 (d,  $J_{\text{CP}} = 3.8$  Hz, C-Me), 112.4 (s, Ph CH), 113.2 (d,  $J_{\text{CP}} = 6.0$  Hz, C-Me), 116.3 (d,  $J_{\text{CP}} = 59.3$  Hz, C-P), 120.4 (d,  $J_{\text{CP}} = 71.3$  Hz, C-P), 127.5 (s, Ph CH), 128.1 (s, Ph CH), 130.3 (s, Ph CH), 130.35 (s, Ph CH), 134.40 (s, Ph C), 134.9 (d,  $J_{\text{CP}} = 18.0$  Hz, Ph C), 158.6 (s, Ph C), 224.5 (s, CO).

HRMS (ESI)  $m/z$ :  $[M+H]^+$  calcd for  $C_{46}H_{39}Mn_2O_8P_2$  891.0876; Found 891.0876. IR (neat)  $\delta$  2012.39, 1930.91  $cm^{-1}$ .

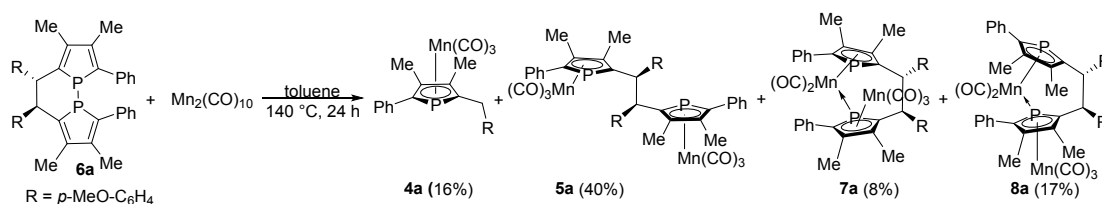

A solution of bisphosphole **6a** (153 mg, 0.25 mmol) and  $Mn_2(CO)_{10}$  (98 mg, 0.25 mmol) in toluene (5 mL) was stirred at  $140\text{ }^\circ\text{C}$  in oil bath for 24 h in a pressure tube (filled with nitrogen). The resulting solution was evaporated to dryness and the crude product was purified by column chromatography (silica gel, Petroleum ether/Dichloromethane = 10:1) providing 36 mg of **4a** as yellow oil (0.081 mmol, 16%,  $R_f = 0.55$ ), 89 mg of **5a** as yellow solid (0.10 mmol, 40%,  $R_f = 0.40$ ), 17 mg of **7a** as yellow solid (0.020 mmol, 8%,  $R_f = 0.38$ ) and 37 mg of **8a** as yellow solid (0.043 mmol, 17%,  $R_f = 0.35$ ). The single crystal of **8a** was grown from a mixture of acetone and  $Et_2O$ .

**7a**: yellow solid, m.p.  $>250\text{ }^\circ\text{C}$ .  $^{31}\text{P}$  NMR ( $CDCl_3$ , 121 MHz):  $\delta$  -70.6, 132.4.  $^1\text{H}$  NMR ( $CDCl_3$ , 300 MHz):  $\delta$  1.42 (s, 3H,  $CH_3$ ), 2.12 (s, 3H,  $CH_3$ ), 2.16 (s, 3H,  $CH_3$ ), 2.22 (s, 3H,  $CH_3$ ), 3.42 (*pseudo-t*,  $J_{CP} = 11.1$  Hz, 1H, CH), 3.67 (s, 3H, OMe), 3.70 (s, 3H, OMe), 4.15 (d,  $J_{CP} = 11.1$  Hz, 1H, CH), 6.45-6.48 (m, 1H, CH), 6.58-6.60 (m, 3H, CH), 6.76-6.78 (m, 1H, CH), 6.99 (s, 2H, CH), 7.18-7.32 (m, 11H, CH).  $^{13}\text{C}\{^1\text{H}\}$  NMR ( $CDCl_3$ , 75 MHz):  $\delta$  13.4 (s,  $CH_3$ ), 13.8 (s,  $CH_3$ ), 14.2 (s,  $CH_3$ ), 14.6 (s,  $CH_3$ ), 49.0 (*pseudo-t*,  $J_{CP} = 9.0$  Hz, CH), 50.1 (*pseudo-t*,  $J_{CP} = 10.5$  Hz, CH), 55.0 (s, OMe), 55.1 (s, OMe), 99.27 (d,  $J_{CP} = 86.3$  Hz, C-P), 99.31 (d,  $J_{CP} = 78.8$  Hz, C-P), 106.5 (d,  $J_{CP} = 2.3$  Hz, C-Me), 106.7 (d,  $J_{CP} = 4.5$  Hz, C-Me), 108.7 (s, C-Me), 110.4 (d,  $J_{CP} = 4.5$  Hz, C-Me), 111.5 (d,  $J_{CP} = 60.8$  Hz, C-P), 112.9 (s, Ph CH), 113.4 (s, Ph CH), 113.6 (s, Ph CH), 118.2 (d,  $J_{CP} = 58.5$  Hz, C-P), 127.7 (d,  $J_{CP} = 5.3$  Hz, Ph CH), 127.8 (s, Ph CH), 128.2 (s, Ph CH), 128.8 (s, Ph CH), 130.5 (d,  $J_{CP} = 7.5$  Hz, Ph CH), 131.0 (d,  $J_{CP} = 4.5$  Hz, Ph CH), 131.8 (d,  $J_{CP} = 8.3$  Hz, Ph C), 132.4 (d,  $J_{CP} = 12.8$  Hz, Ph C), 133.2 (s, Ph CH), 133.9 (s, Ph C), 135.1 (d,  $J_{CP} = 17.3$  Hz, Ph C), 157.6 (s, Ph C), 158.2 (s, Ph C), 224.1 (s, CO), 224.6 (d,  $J_{CP} = 22.5$  Hz, CO), 227.5 (d,  $J_{CP} = 29.3$  Hz,

CO). HRMS (ESI)  $m/z$ :  $[M+H]^+$  calcd for  $C_{45}H_{39}Mn_2O_7P_2$  863.0927; Found 863.0906. IR (neat)  $\delta$  2008.53, 1963.69, 1927.53  $cm^{-1}$ .

**8a**: yellow solid, m.p.  $>250$  °C.  $^{31}P$  NMR ( $CDCl_3$ , 121 MHz):  $\delta$  -46.3, 138.9.  $^1H$  NMR ( $CDCl_3$ , 300 MHz):  $\delta$  1.29 (s, 3H,  $CH_3$ ), 1.94 (s, 3H,  $CH_3$ ), 2.07 (s, 3H,  $CH_3$ ), 2.13 (s, 3H,  $CH_3$ ), 3.46 (*pseudo-t*,  $J = 11.1$  Hz, 1H, CH), 3.67 (s, 3H,  $OCH_3$ ), 3.72 (s, 3H,  $OCH_3$ ), 4.08 (d,  $J = 11.1$  Hz, 1H, CH), 6.54-6.61 (m, 3H, CH), 6.72-6.76 (m, 2H, CH), 6.92-6.95 (m, 2H, CH), 7.11-7.14 (m, 1H, CH), 7.26-7.31 (m, 10H, CH).  $^{13}C\{^1H\}$  NMR ( $CDCl_3$ , 75 MHz):  $\delta$  13.6 (s,  $CH_3$ ), 14.0 (d,  $J_{CP} = 3.0$  Hz,  $CH_3$ ), 14.4 (s,  $CH_3$ ), 16.1 (s,  $CH_3$ ), 50.3 (*pseudo-t*,  $J_{CP} = 9.0$  Hz, CH), 52.6 (*pseudo-t*,  $J_{CP} = 11.3$  Hz, CH), 55.06 (s,  $OCH_3$ ), 55.14 (s,  $OCH_3$ ), 100.8 (d,  $J_{CP} = 5.3$  Hz, C-Me), 103.8 (d,  $J_{CP} = 6.0$  Hz, C-Me), 106.0 (d,  $J_{CP} = 85.5$  Hz, C-P), 106.1 (d,  $J_{CP} = 80.3$  Hz, C-P), 107.0 (d,  $J_{CP} = 3.8$  Hz, C-Me), 108.3 (d,  $J_{CP} = 8.3$  Hz, C-Me), 111.9 (d,  $J_{CP} = 60.0$  Hz, C-P), 112.7 (s, Ph CH), 113.6 (s, Ph CH), 114.7 (s, Ph CH), 120.0 (d,  $J_{CP} = 59.3$  Hz, C-P), 127.7 (d,  $J_{CP} = 9.0$  Hz, Ph CH), 128.0 (s, Ph CH), 128.2 (s, Ph CH), 129.5 (d,  $J_{CP} = 15.1$  Hz, Ph CH), 130.3 (d,  $J_{CP} = 6.8$  Hz, Ph CH), 132.1 (d,  $J_{CP} = 4.5$  Hz, Ph CH), 132.3 (d,  $J_{CP} = 7.5$  Hz, Ph C), 132.4 (s, Ph CH), 132.8 (d,  $J_{CP} = 6.0$  Hz, Ph C), 135.0 (s, Ph C), 135.4 (d,  $J_{CP} = 18.0$  Hz, Ph C), 157.6 (s, Ph C), 158.3 (s, Ph C), 224.2 (s, CO), 226.0 (d,  $J_{CP} = 24.0$  Hz, CO), 227.2 (d,  $J_{CP} = 23.3$  Hz, CO). HRMS (ESI)  $m/z$ :  $[M+H]^+$  calcd for  $C_{45}H_{39}Mn_2O_7P_2$  863.0927; Found 863.0918. IR (neat)  $\delta$  2003.23, 1960.80, 1929.95, 1915.48, 1903.43  $cm^{-1}$ .

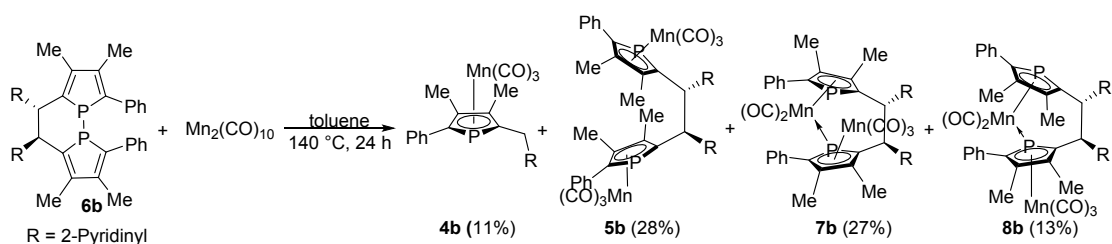

A solution of biphosphole **6b** (139 mg, 0.25 mmol) and  $Mn_2(CO)_{10}$  (98 mg, 0.25 mmol) in toluene (4 mL) was stirred at  $140$  °C in oil bath for 24 h in a pressure tube (filled with nitrogen). The resulting solution was evaporated to dryness and the crude product was purified by column chromatography (silica gel, Petroleum ether/Ethyl

acetate = 10:1) providing 23 mg of **4b** as yellow oil (0.055 mmol, 11%,  $R_f = 0.40$ ), 58 mg of **5b** as yellow solid (0.070 mmol, 28%,  $R_f = 0.45$ ), 54 mg of **7b** as yellow solid (0.067 mmol, 27%,  $R_f = 0.35$ ) and 27 mg of **8b** as yellow solid (0.034 mmol, 13%,  $R_f = 0.33$ ). The single crystal of **7b** was grown from a mixture of DCM and EA.

**4b**: yellow oil.  $^{31}\text{P}$  NMR ( $\text{CDCl}_3$ , 121 MHz):  $\delta$  -28.8.  $^1\text{H}$  NMR ( $\text{CDCl}_3$ , 300 MHz):  $\delta$  2.16 (s, 3H,  $\text{CH}_3$ ), 2.19 (s, 3H,  $\text{CH}_3$ ), 3.56-3.73 (m, 2H,  $\text{CH}_2$ ), 7.15-7.25 (m, 7H, CH), 7.65 (t,  $J = 7.8$  Hz, 1H, CH), 8.58 (s, 1H, CH).  $^{13}\text{C}\{^1\text{H}\}$  NMR ( $\text{CDCl}_3$ , 75 MHz):  $\delta$  13.5 (s,  $\text{CH}_3$ ), 14.0 (s,  $\text{CH}_3$ ), 37.9 (d,  $J_{\text{CP}} = 17.9$  Hz,  $\text{CH}_2$ ), 108.2 (d,  $J_{\text{CP}} = 6.8$  Hz, C-Me), 112.0 (d,  $J_{\text{CP}} = 3.8$  Hz, C-Me), 116.1 (d,  $J_{\text{CP}} = 61.5$  Hz, C-P), 116.3 (d,  $J_{\text{CP}} = 57.8$  Hz, C-P), 121.9 (s, CH), 122.9 (s, CH), 127.8 (s, CH), 128.1 (s, CH), 130.5 (d,  $J_{\text{CP}} = 6.0$  Hz, CH), 134.6 (d,  $J_{\text{CP}} = 17.3$  Hz, C), 136.8 (s, CH), 149.6 (s, CH), 159.4 (s, C), 224.2 (s, CO). HRMS (ESI)  $m/z$ :  $[\text{M}+\text{H}]^+$  calcd for  $\text{C}_{21}\text{H}_{18}\text{MnNO}_3\text{P}$  418.0399; Found 418.0403. IR (neat)  $\delta$  2012.87, 1934.28  $\text{cm}^{-1}$ .

**5b**: yellow solid, m.p.  $>250$  °C.  $^{31}\text{P}$  NMR ( $\text{CDCl}_3$ , 121 MHz):  $\delta$  -9.9.  $^1\text{H}$  NMR ( $\text{CDCl}_3$ , 300 MHz):  $\delta$  2.15 (s, 6H,  $\text{CH}_3$ ),  $\delta$  2.23 (s, 6H,  $\text{CH}_3$ ), 4.37-4.41 (m, 2H, CH), 6.78 (d,  $J = 7.8$  Hz, 2H, CH), 6.92-6.96 (m, 2H, CH), 7.13-7.15 (m, 4H, CH), 7.26-7.30 (m, 8H, CH), 8.49 (d,  $J = 4.5$  Hz, 2H, CH).  $^{13}\text{C}\{^1\text{H}\}$  NMR ( $\text{CDCl}_3$ , 75 MHz):  $\delta$  14.1 (s, 2 $\text{CH}_3$ ), 16.5 (s,  $\text{CH}_3$ ), 16.6 (s,  $\text{CH}_3$ ), 56.6 (d,  $J_{\text{CP}} = 9.8$  Hz, CH), 110.1 (d,  $J_{\text{CP}} = 4.5$  Hz, C-Me), 111.9 (d,  $J_{\text{CP}} = 7.5$  Hz, C-Me), 114.1 (d,  $J_{\text{CP}} = 69.8$  Hz, C-P), 117.6 (d,  $J_{\text{CP}} = 60.8$  Hz, C-P), 121.8 (s, CH), 123.5 (s, CH), 127.6 (s, CH), 128.2 (s, CH), 130.2 (d,  $J_{\text{CP}} = 5.3$  Hz, CH), 135.2 (d,  $J_{\text{CP}} = 17.3$  Hz, C), 136.0 (s, CH), 148.3 (s, CH), 162.5 (s, C), 223.5 (s, CO). HRMS (ESI)  $m/z$ :  $[\text{M}+\text{H}]^+$  calcd for  $\text{C}_{42}\text{H}_{33}\text{Mn}_2\text{N}_2\text{O}_6\text{P}_2$  833.0569; Found 833.0557. IR (neat)  $\delta$  2015.28, 2005.64, 1946.34, 1938.62, 1928.98, 1911.14  $\text{cm}^{-1}$ .

**7b**: yellow solid, m.p.  $>250$  °C.  $^{31}\text{P}$  NMR ( $\text{CDCl}_3$ , 121 MHz):  $\delta$  -66.9, 131.8.  $^1\text{H}$  NMR ( $\text{CDCl}_3$ , 300 MHz):  $\delta$  1.35 (s, 3H,  $\text{CH}_3$ ), 2.12-2.27 (m, 9H, 3 $\text{CH}_3$ ), 3.88 (t,  $J = 11.1$  Hz, 1H, CH), 4.63 (s, 1H, CH), 6.86-7.31 (m, 16H, CH), 8.46 (s, 2H, CH).  $^{13}\text{C}\{^1\text{H}\}$  NMR ( $\text{CDCl}_3$ , 75 MHz):  $\delta$  13.3 (s,  $\text{CH}_3$ ), 13.6 (d,  $J_{\text{CP}} = 3.0$  Hz,  $\text{CH}_3$ ), 14.1 (s,  $\text{CH}_3$ ), 14.6 (d,  $J_{\text{CP}} = 3.0$  Hz,  $\text{CH}_3$ ), 49.3 (s, CH), 51.4 (s, CH), 98.0 (s, C-Me), 99.2 (d,

$J_{CP} = 7.5$  Hz, C-Me), 106.0 (s, C-Me), 107.3 (d,  $J_{CP} = 66.8$  Hz, 2C-P), 109.0 (s, C-Me), 109.7 (d,  $J_{CP} = 60.8$  Hz, C-P), 119.5 (d,  $J_{CP} = 59.3$  Hz, C-P), 121.2 (s, CH), 121.6 (s, CH), 124.0 (s, CH), 127.5 (s, CH), 127.6 (s, CH), 127.8 (s, CH), 128.2 (s, CH), 130.5 (s, CH), 130.6 (s, CH), 131.1 (s, CH), 131.2 (s, CH), 132.6 (d,  $J_{CP} = 12.8$  Hz, C), 135.4 (d,  $J_{CP} = 16.5$  Hz, C), 135.7 (s, CH), 149.0 (s, CH), 149.6 (s, CH), 159.5 (d,  $J_{CP} = 9.0$  Hz, C), 160.3 (s, C), 224.1 (s, CO), 224.9 (d,  $J_{CP} = 24.8$  Hz, CO), 227.7 (d,  $J_{CP} = 29.3$  Hz, CO). HRMS (ESI)  $m/z$ :  $[M+H]^+$  calcd for  $C_{41}H_{33}Mn_2N_2O_5P_2$  805.0620; Found 805.0622. IR (neat)  $\delta$  2008.53, 1963.73, 1938.62, 1916.45, 1899.09  $cm^{-1}$ .

**8b**: yellow solid, m.p.  $>250$  °C.  $^{31}P$  NMR ( $CDCl_3$ , 121 MHz):  $\delta$  -44.5, 145.3.  $^1H$  NMR ( $CDCl_3$ , 300 MHz):  $\delta$  1.22 (s, 3H,  $CH_3$ ), 1.94 (s, 3H,  $CH_3$ ), 2.08 (s, 3H,  $CH_3$ ), 2.14 (s, 3H,  $CH_3$ ), 3.98 (*pseudo-t*,  $J = 11.1$  Hz, 1H, CH), 4.53 (d,  $J = 10.8$  Hz, 1H, CH), 6.71-6.73 (m, 1H, CH), 6.84 (m, 1H, CH), 6.96 (m, 2H, CH), 7.26-7.33 (m, 12H, CH), 8.51 (d,  $J = 13.5$  Hz, 2H, CH).  $^{13}C\{^1H\}$  NMR ( $CDCl_3$ , 75 MHz):  $\delta$  13.2 (s,  $CH_3$ ), 14.1 (s,  $CH_3$ ), 14.3 (s,  $CH_3$ ), 15.3 (s,  $CH_3$ ), 50.9 (t,  $J_{CP} = 7.5$  Hz, CH), 53.7 (t,  $J_{CP} = 11.3$  Hz, CH), 100.25 (s, C-Me), 100.33 (s, C-Me), 105.5 (d,  $J_{CP} = 67.5$  Hz, C-P), 105.54 (d,  $J_{CP} = 63.8$  Hz, C-P), 107.3 (d,  $J_{CP} = 4.5$  Hz, C-Me), 108.3 (d,  $J_{CP} = 7.5$  Hz, C-Me), 109.5 (d,  $J_{CP} = 60.0$  Hz, C-P), 121.1 (s, CH), 121.4 (d,  $J_{CP} = 60.8$  Hz, C-P), 122.0 (s, CH), 123.9 (s, CH), 126.5 (s, CH), 127.7 (d,  $J_{CP} = 6.8$  Hz, CH), 127.9 (s, CH), 128.2 (s, CH), 130.3 (d,  $J_{CP} = 7.6$  Hz, CH), 132.18 (s, CH), 132.23 (s, CH), 132.3 (s, C), 135.5 (d,  $J_{CP} = 17.3$  Hz, C), 135.6 (s, CH), 136.4 (s, CH), 149.5 (s, CH), 150.0 (s, CH), 160.5 (d,  $J_{CP} = 6.0$  Hz, C), 160.94 (s, C), 224.0 (s, CO), 226.2 (d,  $J_{CP} = 23.3$  Hz, CO), 226.8 (d,  $J_{CP} = 24.0$  Hz, CO). HRMS (ESI)  $m/z$ :  $[M+H]^+$  calcd for  $C_{41}H_{33}Mn_2N_2O_5P_2$  805.0620; Found 805.0624. IR (neat)  $\delta$  2009.01, 1963.69, 1934.77, 1911.14, 1901.98  $cm^{-1}$ .



## X-ray crystallographic studies of compound 5a

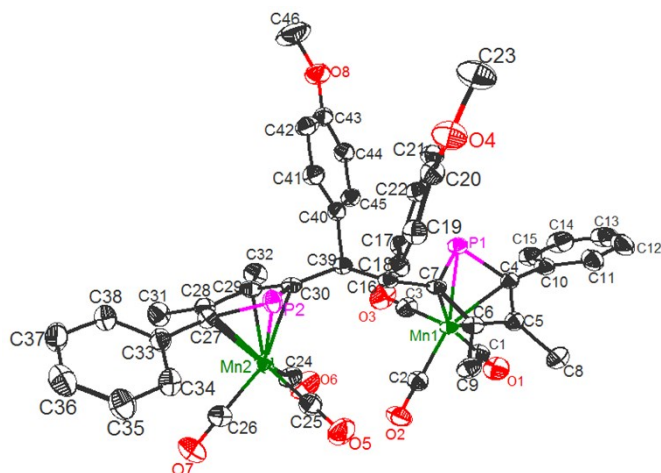

**Table 1 Crystal data and structure refinement for 5a.**

|                                               |                                                               |
|-----------------------------------------------|---------------------------------------------------------------|
| Identification code                           | <b>5a</b>                                                     |
| Empirical formula                             | $C_{46}H_{38}Mn_2O_8P_2$                                      |
| Formula weight                                | 890.58                                                        |
| Temperature/K                                 | 293(2)                                                        |
| Crystal system                                | monoclinic                                                    |
| Space group                                   | $P2_1/c$                                                      |
| $a/\text{\AA}$                                | 12.3750(5)                                                    |
| $b/\text{\AA}$                                | 15.3397(4)                                                    |
| $c/\text{\AA}$                                | 23.4824(8)                                                    |
| $\alpha/^\circ$                               | 90                                                            |
| $\beta/^\circ$                                | 102.276(4)                                                    |
| $\gamma/^\circ$                               | 90                                                            |
| Volume/ $\text{\AA}^3$                        | 4355.7(3)                                                     |
| Z                                             | 4                                                             |
| $\rho_{\text{calc}}/\text{g/cm}^3$            | 1.358                                                         |
| $\mu/\text{mm}^{-1}$                          | 5.836                                                         |
| F(000)                                        | 1832.0                                                        |
| Crystal size/ $\text{mm}^3$                   | $0.3 \times 0.13 \times 0.12$                                 |
| Radiation                                     | $\text{CuK}\alpha$ ( $\lambda = 1.54184$ )                    |
| $2\theta$ range for data collection/ $^\circ$ | 7.31 to 134.15                                                |
| Index ranges                                  | $-14 \leq h \leq 14, -18 \leq k \leq 11, -28 \leq l \leq 27$  |
| Reflections collected                         | 19772                                                         |
| Independent reflections                       | 7715 [ $R_{\text{int}} = 0.0402, R_{\text{sigma}} = 0.0484$ ] |
| Data/restraints/parameters                    | 7715/0/529                                                    |
| Goodness-of-fit on $F^2$                      | 1.039                                                         |
| Final R indexes [ $I \geq 2\sigma(I)$ ]       | $R_1 = 0.0453, wR_2 = 0.1063$                                 |

Final R indexes [all data]  
Largest diff. peak/hole / e Å<sup>-3</sup>

R<sub>1</sub> = 0.0655, wR<sub>2</sub> = 0.1152  
0.41/-0.26

**Table 2 Bond Lengths for 5a.**

| Atom | Atom | Length/Å | Atom | Atom | Length/Å   |
|------|------|----------|------|------|------------|
| C1   | Mn1  | 1.800(4) | C24  | O6   | 1.146(4)   |
| C1   | O1   | 1.135(4) | C25  | Mn2  | 1.786(4)   |
| C2   | Mn1  | 1.805(4) | C25  | O5   | 1.144(4)   |
| C2   | O2   | 1.138(4) | C26  | Mn2  | 1.795(4)   |
| C3   | Mn1  | 1.794(4) | C26  | O7   | 1.142(4)   |
| C3   | O3   | 1.141(4) | C27  | C28  | 1.422(4)   |
| C4   | C5   | 1.424(4) | C27  | C33  | 1.491(4)   |
| C4   | C10  | 1.488(4) | C27  | P2   | 1.775(3)   |
| C4   | P1   | 1.771(3) | C27  | Mn2  | 2.170(3)   |
| C4   | Mn1  | 2.178(3) | C28  | C29  | 1.426(4)   |
| C5   | C6   | 1.416(4) | C28  | C31  | 1.509(5)   |
| C5   | C8   | 1.520(4) | C28  | Mn2  | 2.163(3)   |
| C5   | Mn1  | 2.158(3) | C29  | C30  | 1.423(4)   |
| C6   | C7   | 1.424(4) | C29  | C32  | 1.521(4)   |
| C6   | C9   | 1.509(4) | C29  | Mn2  | 2.172(3)   |
| C6   | Mn1  | 2.182(3) | C30  | C39  | 1.529(4)   |
| C7   | C16  | 1.528(4) | C30  | P2   | 1.779(3)   |
| C7   | P1   | 1.786(3) | C30  | Mn2  | 2.188(3)   |
| C7   | Mn1  | 2.189(3) | C33  | C34  | 1.391(5)   |
| C10  | C11  | 1.386(5) | C33  | C38  | 1.393(5)   |
| C10  | C15  | 1.385(5) | C34  | C35  | 1.386(5)   |
| C11  | C12  | 1.389(6) | C35  | C36  | 1.368(6)   |
| C12  | C13  | 1.366(7) | C36  | C37  | 1.368(6)   |
| C13  | C14  | 1.367(7) | C37  | C38  | 1.389(5)   |
| C14  | C15  | 1.389(5) | C39  | C40  | 1.530(4)   |
| C16  | C17  | 1.521(4) | C40  | C41  | 1.376(4)   |
| C16  | C39  | 1.571(4) | C40  | C45  | 1.400(4)   |
| C17  | C18  | 1.403(4) | C41  | C42  | 1.384(5)   |
| C17  | C22  | 1.388(4) | C42  | C43  | 1.391(5)   |
| C18  | C19  | 1.374(4) | C43  | C44  | 1.370(5)   |
| C19  | C20  | 1.385(4) | C43  | O8   | 1.367(4)   |
| C20  | C21  | 1.391(4) | C44  | C45  | 1.377(4)   |
| C20  | O4   | 1.367(4) | C46  | O8   | 1.396(6)   |
| C21  | C22  | 1.377(4) | P1   | Mn1  | 2.3898(9)  |
| C23  | O4   | 1.410(5) | P2   | Mn2  | 2.3835(10) |

C24 Mn2 1.792(4)

**Table 3 Bond Angles for 5a.**

| Atom | Atom | Atom | Angle/°   | Atom | Atom | Atom | Angle/°    |
|------|------|------|-----------|------|------|------|------------|
| O1   | C1   | Mn1  | 178.6(3)  | C37  | C36  | C35  | 119.7(4)   |
| O2   | C2   | Mn1  | 178.1(4)  | C36  | C37  | C38  | 121.1(4)   |
| O3   | C3   | Mn1  | 178.3(4)  | C37  | C38  | C33  | 119.9(4)   |
| C5   | C4   | C10  | 125.9(3)  | C30  | C39  | C16  | 112.0(2)   |
| C5   | C4   | P1   | 112.7(2)  | C30  | C39  | C40  | 108.4(2)   |
| C5   | C4   | Mn1  | 70.06(17) | C40  | C39  | C16  | 117.5(2)   |
| C10  | C4   | P1   | 121.2(2)  | C41  | C40  | C39  | 122.2(3)   |
| C10  | C4   | Mn1  | 128.7(2)  | C41  | C40  | C45  | 117.4(3)   |
| P1   | C4   | Mn1  | 73.67(11) | C45  | C40  | C39  | 120.2(3)   |
| C4   | C5   | C8   | 124.1(3)  | C40  | C41  | C42  | 121.9(3)   |
| C4   | C5   | Mn1  | 71.58(18) | C41  | C42  | C43  | 119.8(3)   |
| C6   | C5   | C4   | 112.1(3)  | C44  | C43  | C42  | 118.8(3)   |
| C6   | C5   | C8   | 123.8(3)  | O8   | C43  | C42  | 124.7(4)   |
| C6   | C5   | Mn1  | 71.86(17) | O8   | C43  | C44  | 116.5(3)   |
| C8   | C5   | Mn1  | 125.7(2)  | C43  | C44  | C45  | 121.2(3)   |
| C5   | C6   | C7   | 113.5(3)  | C44  | C45  | C40  | 120.8(3)   |
| C5   | C6   | C9   | 122.8(3)  | C4   | P1   | C7   | 90.20(15)  |
| C5   | C6   | Mn1  | 70.05(17) | C4   | P1   | Mn1  | 61.00(10)  |
| C7   | C6   | C9   | 123.7(3)  | C7   | P1   | Mn1  | 61.23(9)   |
| C7   | C6   | Mn1  | 71.27(16) | C27  | P2   | C30  | 90.23(15)  |
| C9   | C6   | Mn1  | 129.2(2)  | C27  | P2   | Mn2  | 60.85(10)  |
| C6   | C7   | C16  | 122.5(3)  | C30  | P2   | Mn2  | 61.41(9)   |
| C6   | C7   | P1   | 111.3(2)  | C1   | Mn1  | C2   | 91.28(16)  |
| C6   | C7   | Mn1  | 70.70(16) | C1   | Mn1  | C4   | 91.50(14)  |
| C16  | C7   | P1   | 125.4(2)  | C1   | Mn1  | C5   | 93.44(15)  |
| C16  | C7   | Mn1  | 131.2(2)  | C1   | Mn1  | C6   | 125.56(15) |
| P1   | C7   | Mn1  | 73.11(10) | C1   | Mn1  | C7   | 159.35(15) |
| C11  | C10  | C4   | 119.8(3)  | C1   | Mn1  | P1   | 126.48(12) |
| C15  | C10  | C4   | 121.5(3)  | C2   | Mn1  | C4   | 147.53(14) |
| C15  | C10  | C11  | 118.5(3)  | C2   | Mn1  | C5   | 109.18(14) |
| C10  | C11  | C12  | 120.7(4)  | C2   | Mn1  | C6   | 86.94(14)  |
| C13  | C12  | C11  | 119.9(5)  | C2   | Mn1  | C7   | 98.64(13)  |
| C12  | C13  | C14  | 120.4(4)  | C2   | Mn1  | P1   | 142.23(11) |
| C13  | C14  | C15  | 120.2(5)  | C3   | Mn1  | C1   | 90.29(17)  |
| C10  | C15  | C14  | 120.4(4)  | C3   | Mn1  | C2   | 93.79(17)  |
| C7   | C16  | C39  | 114.5(2)  | C3   | Mn1  | C4   | 118.54(15) |

|     |     |     |           |     |     |     |            |
|-----|-----|-----|-----------|-----|-----|-----|------------|
| C17 | C16 | C7  | 107.9(2)  | C3  | Mn1 | C5  | 156.62(15) |
| C17 | C16 | C39 | 116.9(2)  | C3  | Mn1 | C6  | 144.15(15) |
| C18 | C17 | C16 | 120.4(3)  | C3  | Mn1 | C7  | 106.95(14) |
| C22 | C17 | C16 | 122.7(3)  | C3  | Mn1 | P1  | 87.69(12)  |
| C22 | C17 | C18 | 116.8(3)  | C4  | Mn1 | C6  | 65.43(12)  |
| C19 | C18 | C17 | 121.7(3)  | C4  | Mn1 | C7  | 70.48(11)  |
| C18 | C19 | C20 | 120.3(3)  | C4  | Mn1 | P1  | 45.33(8)   |
| C19 | C20 | C21 | 119.2(3)  | C5  | Mn1 | C4  | 38.35(11)  |
| O4  | C20 | C19 | 115.8(3)  | C5  | Mn1 | C6  | 38.09(11)  |
| O4  | C20 | C21 | 125.0(3)  | C5  | Mn1 | C7  | 66.23(11)  |
| C22 | C21 | C20 | 119.8(3)  | C5  | Mn1 | P1  | 71.59(9)   |
| C21 | C22 | C17 | 122.2(3)  | C6  | Mn1 | C7  | 38.03(11)  |
| O6  | C24 | Mn2 | 179.3(4)  | C6  | Mn1 | P1  | 70.97(8)   |
| O5  | C25 | Mn2 | 179.7(4)  | C7  | Mn1 | P1  | 45.66(7)   |
| O7  | C26 | Mn2 | 179.3(4)  | C24 | Mn2 | C26 | 89.97(19)  |
| C28 | C27 | C33 | 127.4(3)  | C24 | Mn2 | C27 | 150.08(15) |
| C28 | C27 | P2  | 113.0(2)  | C24 | Mn2 | C28 | 111.78(15) |
| C28 | C27 | Mn2 | 70.55(19) | C24 | Mn2 | C29 | 88.86(15)  |
| C33 | C27 | P2  | 119.5(2)  | C24 | Mn2 | C30 | 99.37(15)  |
| C33 | C27 | Mn2 | 127.2(2)  | C24 | Mn2 | P2  | 141.98(13) |
| P2  | C27 | Mn2 | 73.55(12) | C25 | Mn2 | C24 | 92.84(17)  |
| C27 | C28 | C29 | 111.4(3)  | C25 | Mn2 | C26 | 91.92(18)  |
| C27 | C28 | C31 | 124.9(3)  | C25 | Mn2 | C27 | 116.91(15) |
| C27 | C28 | Mn2 | 71.15(18) | C25 | Mn2 | C28 | 154.94(16) |
| C29 | C28 | C31 | 123.7(3)  | C25 | Mn2 | C29 | 143.63(15) |
| C29 | C28 | Mn2 | 71.13(19) | C25 | Mn2 | C30 | 106.14(15) |
| C31 | C28 | Mn2 | 126.4(2)  | C25 | Mn2 | P2  | 86.02(13)  |
| C28 | C29 | C32 | 122.9(3)  | C26 | Mn2 | C27 | 92.06(16)  |
| C28 | C29 | Mn2 | 70.45(18) | C26 | Mn2 | C28 | 92.66(16)  |
| C30 | C29 | C28 | 113.8(3)  | C26 | Mn2 | C29 | 124.43(16) |
| C30 | C29 | C32 | 123.3(3)  | C26 | Mn2 | C30 | 159.09(16) |
| C30 | C29 | Mn2 | 71.57(17) | C26 | Mn2 | P2  | 128.04(14) |
| C32 | C29 | Mn2 | 128.8(2)  | C27 | Mn2 | C29 | 65.60(12)  |
| C29 | C30 | C39 | 122.4(3)  | C27 | Mn2 | C30 | 70.59(12)  |
| C29 | C30 | P2  | 111.4(2)  | C27 | Mn2 | P2  | 45.59(8)   |
| C29 | C30 | Mn2 | 70.33(17) | C28 | Mn2 | C27 | 38.30(12)  |
| C39 | C30 | P2  | 126.0(2)  | C28 | Mn2 | C29 | 38.42(12)  |
| C39 | C30 | Mn2 | 128.2(2)  | C28 | Mn2 | C30 | 66.53(12)  |
| P2  | C30 | Mn2 | 73.04(11) | C28 | Mn2 | P2  | 71.84(9)   |
| C34 | C33 | C27 | 120.3(3)  | C29 | Mn2 | C30 | 38.10(11)  |

|     |     |     |          |     |     |     |          |
|-----|-----|-----|----------|-----|-----|-----|----------|
| C34 | C33 | C38 | 118.0(3) | C29 | Mn2 | P2  | 71.08(9) |
| C38 | C33 | C27 | 121.6(3) | C30 | Mn2 | P2  | 45.55(8) |
| C35 | C34 | C33 | 121.3(3) | C20 | O4  | C23 | 118.2(3) |
| C36 | C35 | C34 | 120.0(4) | C43 | O8  | C46 | 118.2(4) |

### X-ray crystallographic studies of compound 5b

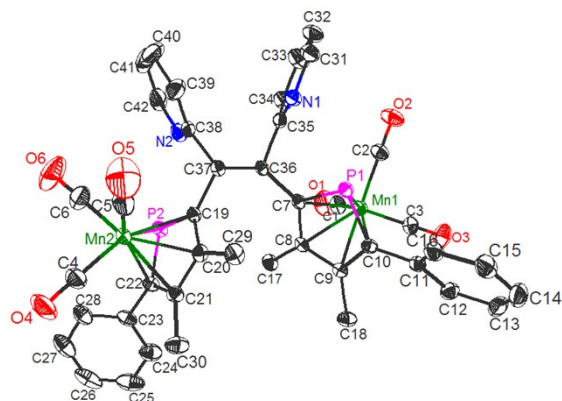

**Table 4 Crystal data and structure refinement for 5b.**

|                                      |                                                                                              |
|--------------------------------------|----------------------------------------------------------------------------------------------|
| Identification code                  | <b>5b</b>                                                                                    |
| Empirical formula                    | C <sub>42</sub> H <sub>34</sub> Mn <sub>2</sub> N <sub>2</sub> O <sub>7</sub> P <sub>2</sub> |
| Formula weight                       | 850.53                                                                                       |
| Temperature/K                        | 293(2)                                                                                       |
| Crystal system                       | monoclinic                                                                                   |
| Space group                          | P2 <sub>1</sub> /c                                                                           |
| a/Å                                  | 18.7464(3)                                                                                   |
| b/Å                                  | 13.8241(2)                                                                                   |
| c/Å                                  | 15.3780(2)                                                                                   |
| α/°                                  | 90                                                                                           |
| β/°                                  | 97.0866(14)                                                                                  |
| γ/°                                  | 90                                                                                           |
| Volume/Å <sup>3</sup>                | 3954.81(11)                                                                                  |
| Z                                    | 4                                                                                            |
| ρ <sub>calc</sub> /g/cm <sup>3</sup> | 1.428                                                                                        |
| μ/mm <sup>-1</sup>                   | 6.395                                                                                        |
| F(000)                               | 1744.0                                                                                       |
| Crystal size/mm <sup>3</sup>         | 0.2 × 0.17 × 0.15                                                                            |
| Radiation                            | CuKα (λ = 1.54184)                                                                           |
| 2θ range for data collection/°       | 7.968 to 134.16                                                                              |
| Index ranges                         | -21 ≤ h ≤ 22, -15 ≤ k ≤ 16, -12 ≤ l ≤ 18                                                     |
| Reflections collected                | 17079                                                                                        |

|                                                |                                                                  |
|------------------------------------------------|------------------------------------------------------------------|
| Independent reflections                        | 7061 [ $R_{\text{int}} = 0.0335$ , $R_{\text{sigma}} = 0.0407$ ] |
| Data/restraints/parameters                     | 7061/0/503                                                       |
| Goodness-of-fit on $F^2$                       | 1.042                                                            |
| Final R indexes [ $I \geq 2\sigma(I)$ ]        | $R_1 = 0.0410$ , $wR_2 = 0.1006$                                 |
| Final R indexes [all data]                     | $R_1 = 0.0534$ , $wR_2 = 0.1083$                                 |
| Largest diff. peak/hole / $e \text{ \AA}^{-3}$ | 0.32/-0.43                                                       |

**Table 5 Bond Lengths for 5b.**

| Atom | Atom | Length/Å | Atom | Atom | Length/Å |
|------|------|----------|------|------|----------|
| C1   | Mn1  | 1.802(3) | C19  | P2   | 1.780(3) |
| C1   | O1   | 1.139(4) | C20  | C21  | 1.418(4) |
| C2   | Mn1  | 1.803(3) | C20  | C29  | 1.519(4) |
| C2   | O2   | 1.137(4) | C20  | Mn2  | 2.166(3) |
| C3   | Mn1  | 1.785(3) | C21  | C22  | 1.421(4) |
| C3   | O3   | 1.141(4) | C21  | C30  | 1.507(4) |
| C4   | Mn2  | 1.793(3) | C21  | Mn2  | 2.174(3) |
| C4   | O4   | 1.136(4) | C22  | C23  | 1.487(4) |
| C5   | Mn2  | 1.781(4) | C22  | Mn2  | 2.186(3) |
| C5   | O5   | 1.127(5) | C22  | P2   | 1.776(3) |
| C6   | Mn2  | 1.789(4) | C23  | C24  | 1.383(5) |
| C6   | O6   | 1.138(5) | C23  | C28  | 1.381(5) |
| C7   | C8   | 1.424(4) | C24  | C25  | 1.387(5) |
| C7   | C36  | 1.516(4) | C25  | C26  | 1.360(7) |
| C7   | Mn1  | 2.171(3) | C26  | C27  | 1.365(7) |
| C7   | P1   | 1.786(3) | C27  | C28  | 1.389(5) |
| C8   | C9   | 1.422(4) | C31  | C32  | 1.366(5) |
| C8   | C17  | 1.504(4) | C31  | N1   | 1.338(4) |
| C8   | Mn1  | 2.167(3) | C32  | C33  | 1.371(5) |
| C9   | C10  | 1.418(4) | C33  | C34  | 1.378(5) |
| C9   | C18  | 1.519(4) | C34  | C35  | 1.378(4) |
| C9   | Mn1  | 2.197(3) | C35  | C36  | 1.521(4) |
| C10  | C11  | 1.486(4) | C35  | N1   | 1.337(4) |
| C10  | Mn1  | 2.208(3) | C36  | C37  | 1.575(4) |
| C10  | P1   | 1.776(3) | C37  | C38  | 1.517(4) |
| C11  | C12  | 1.395(4) | C38  | C39  | 1.382(5) |
| C11  | C16  | 1.396(4) | C38  | N2   | 1.335(4) |
| C12  | C13  | 1.384(5) | C39  | C40  | 1.394(6) |
| C13  | C14  | 1.366(6) | C40  | C41  | 1.355(8) |
| C14  | C15  | 1.364(6) | C41  | C42  | 1.366(7) |
| C15  | C16  | 1.375(5) | C42  | N2   | 1.333(5) |

|     |     |          |     |    |           |
|-----|-----|----------|-----|----|-----------|
| C19 | C20 | 1.422(4) | Mn1 | P1 | 2.3723(8) |
| C19 | C37 | 1.520(4) | Mn2 | P2 | 2.3752(8) |
| C19 | Mn2 | 2.183(3) |     |    |           |

**Table 6 Bond Angles for 5b**

| Atom | Atom | Atom | Angle/°    | Atom | Atom | Atom | Angle/°    |
|------|------|------|------------|------|------|------|------------|
| O1   | C1   | Mn1  | 179.4(3)   | C7   | C36  | C35  | 111.6(2)   |
| O2   | C2   | Mn1  | 178.1(3)   | C7   | C36  | C37  | 114.0(2)   |
| O3   | C3   | Mn1  | 178.6(3)   | C35  | C36  | C37  | 108.1(2)   |
| O4   | C4   | Mn2  | 179.5(5)   | C19  | C37  | C36  | 111.9(2)   |
| O5   | C5   | Mn2  | 179.5(6)   | C38  | C37  | C19  | 113.0(2)   |
| O6   | C6   | Mn2  | 179.1(4)   | C38  | C37  | C36  | 107.5(2)   |
| C8   | C7   | C36  | 124.5(2)   | C39  | C38  | C37  | 120.6(3)   |
| C8   | C7   | Mn1  | 70.69(15)  | N2   | C38  | C37  | 116.5(3)   |
| C8   | C7   | P1   | 112.0(2)   | N2   | C38  | C39  | 122.7(3)   |
| C36  | C7   | Mn1  | 124.53(17) | C38  | C39  | C40  | 117.9(5)   |
| C36  | C7   | P1   | 123.50(19) | C41  | C40  | C39  | 119.7(5)   |
| P1   | C7   | Mn1  | 72.95(9)   | C40  | C41  | C42  | 118.3(4)   |
| C7   | C8   | C17  | 125.2(3)   | N2   | C42  | C41  | 124.0(5)   |
| C7   | C8   | Mn1  | 70.99(14)  | C1   | Mn1  | C2   | 90.98(15)  |
| C9   | C8   | C7   | 112.9(2)   | C1   | Mn1  | C7   | 99.87(13)  |
| C9   | C8   | C17  | 121.9(3)   | C1   | Mn1  | C8   | 88.42(13)  |
| C9   | C8   | Mn1  | 72.14(15)  | C1   | Mn1  | C9   | 111.44(13) |
| C17  | C8   | Mn1  | 126.55(19) | C1   | Mn1  | C10  | 149.01(13) |
| C8   | C9   | C18  | 122.7(2)   | C1   | Mn1  | P1   | 143.13(12) |
| C8   | C9   | Mn1  | 69.84(14)  | C2   | Mn1  | C7   | 103.43(13) |
| C10  | C9   | C8   | 112.4(2)   | C2   | Mn1  | C8   | 140.54(14) |
| C10  | C9   | C18  | 124.5(3)   | C2   | Mn1  | C9   | 156.09(12) |
| C10  | C9   | Mn1  | 71.62(14)  | C2   | Mn1  | C10  | 119.63(12) |
| C18  | C9   | Mn1  | 132.7(2)   | C2   | Mn1  | P1   | 85.80(10)  |
| C9   | C10  | C11  | 127.0(2)   | C3   | Mn1  | C1   | 90.97(15)  |
| C9   | C10  | Mn1  | 70.81(15)  | C3   | Mn1  | C2   | 89.25(15)  |
| C9   | C10  | P1   | 112.8(2)   | C3   | Mn1  | C7   | 163.06(12) |
| C11  | C10  | Mn1  | 126.75(19) | C3   | Mn1  | C8   | 130.20(13) |
| C11  | C10  | P1   | 120.2(2)   | C3   | Mn1  | C9   | 98.22(13)  |
| P1   | C10  | Mn1  | 72.17(9)   | C3   | Mn1  | C10  | 93.94(12)  |
| C12  | C11  | C10  | 123.4(3)   | C3   | Mn1  | P1   | 125.63(10) |
| C12  | C11  | C16  | 117.5(3)   | C7   | Mn1  | C9   | 65.75(10)  |
| C16  | C11  | C10  | 119.1(3)   | C7   | Mn1  | C10  | 70.12(10)  |

|     |     |     |           |     |     |     |            |
|-----|-----|-----|-----------|-----|-----|-----|------------|
| C13 | C12 | C11 | 120.4(3)  | C7  | Mn1 | P1  | 46.03(7)   |
| C14 | C13 | C12 | 120.6(4)  | C8  | Mn1 | C7  | 38.32(10)  |
| C15 | C14 | C13 | 119.9(3)  | C8  | Mn1 | C9  | 38.02(10)  |
| C14 | C15 | C16 | 120.5(4)  | C8  | Mn1 | C10 | 65.29(10)  |
| C15 | C16 | C11 | 121.0(3)  | C8  | Mn1 | P1  | 71.86(7)   |
| C20 | C19 | C37 | 123.4(2)  | C9  | Mn1 | C10 | 37.57(10)  |
| C20 | C19 | Mn2 | 70.30(16) | C9  | Mn1 | P1  | 71.35(7)   |
| C20 | C19 | P2  | 112.7(2)  | C10 | Mn1 | P1  | 45.47(7)   |
| C37 | C19 | Mn2 | 127.8(2)  | C4  | Mn2 | C19 | 156.71(15) |
| C37 | C19 | P2  | 123.8(2)  | C4  | Mn2 | C20 | 119.76(16) |
| P2  | C19 | Mn2 | 72.85(10) | C4  | Mn2 | C21 | 91.60(15)  |
| C19 | C20 | C29 | 125.4(3)  | C4  | Mn2 | C22 | 95.38(14)  |
| C19 | C20 | Mn2 | 71.54(16) | C4  | Mn2 | P2  | 133.75(12) |
| C21 | C20 | C19 | 112.4(2)  | C5  | Mn2 | C4  | 90.16(18)  |
| C21 | C20 | C29 | 122.2(3)  | C5  | Mn2 | C6  | 90.5(2)    |
| C21 | C20 | Mn2 | 71.22(17) | C5  | Mn2 | C19 | 96.12(15)  |
| C29 | C20 | Mn2 | 127.1(2)  | C5  | Mn2 | C20 | 90.21(16)  |
| C20 | C21 | C22 | 112.5(2)  | C5  | Mn2 | C21 | 117.41(18) |
| C20 | C21 | C30 | 124.0(3)  | C5  | Mn2 | C22 | 154.78(17) |
| C20 | C21 | Mn2 | 70.63(17) | C5  | Mn2 | P2  | 135.98(14) |
| C22 | C21 | C30 | 123.4(3)  | C6  | Mn2 | C4  | 92.3(2)    |
| C22 | C21 | Mn2 | 71.42(17) | C6  | Mn2 | C19 | 110.02(15) |
| C30 | C21 | Mn2 | 128.7(2)  | C6  | Mn2 | C20 | 147.97(16) |
| C21 | C22 | C23 | 123.9(3)  | C6  | Mn2 | C21 | 151.83(17) |
| C21 | C22 | Mn2 | 70.53(17) | C6  | Mn2 | C22 | 113.79(17) |
| C21 | C22 | P2  | 112.8(2)  | C6  | Mn2 | P2  | 85.66(13)  |
| C23 | C22 | Mn2 | 129.5(2)  | C19 | Mn2 | C22 | 69.96(10)  |
| C23 | C22 | P2  | 123.0(2)  | C19 | Mn2 | P2  | 45.74(7)   |
| P2  | C22 | Mn2 | 72.85(10) | C20 | Mn2 | C19 | 38.16(10)  |
| C24 | C23 | C22 | 118.6(3)  | C20 | Mn2 | C21 | 38.15(11)  |
| C28 | C23 | C22 | 122.8(3)  | C20 | Mn2 | C22 | 65.71(11)  |
| C28 | C23 | C24 | 118.6(3)  | C20 | Mn2 | P2  | 71.93(8)   |
| C23 | C24 | C25 | 120.6(4)  | C21 | Mn2 | C19 | 65.60(10)  |
| C26 | C25 | C24 | 120.1(5)  | C21 | Mn2 | C22 | 38.05(11)  |
| C25 | C26 | C27 | 120.1(4)  | C21 | Mn2 | P2  | 71.72(8)   |
| C26 | C27 | C28 | 120.4(4)  | C22 | Mn2 | P2  | 45.59(7)   |
| C23 | C28 | C27 | 120.1(4)  | C35 | N1  | C31 | 117.8(3)   |
| N1  | C31 | C32 | 123.5(3)  | C42 | N2  | C38 | 117.3(4)   |
| C31 | C32 | C33 | 118.6(3)  | C7  | P1  | Mn1 | 61.03(9)   |
| C32 | C33 | C34 | 118.9(3)  | C10 | P1  | C7  | 89.84(13)  |



|     |     |     |          |     |    |     |           |
|-----|-----|-----|----------|-----|----|-----|-----------|
| C33 | C34 | C35 | 119.4(3) | C10 | P1 | Mn1 | 62.36(8)  |
| C34 | C35 | C36 | 121.8(3) | C19 | P2 | Mn2 | 61.41(9)  |
| N1  | C35 | C34 | 121.9(3) | C22 | P2 | C19 | 89.54(13) |
| N1  | C35 | C36 | 116.4(2) | C22 | P2 | Mn2 | 61.56(10) |

### X-ray crystallographic studies of compound 7b

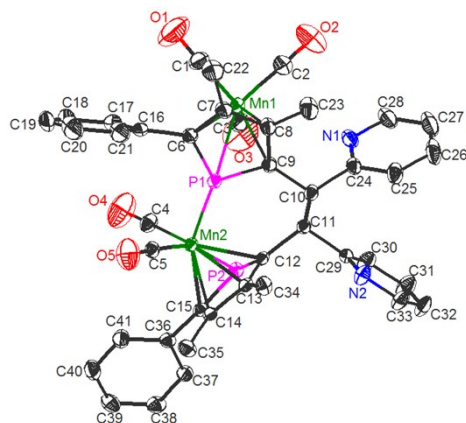

**Table 7 Crystal data and structure refinement for 7b.**

|                                               |                                                              |
|-----------------------------------------------|--------------------------------------------------------------|
| Identification code                           | <b>7b</b>                                                    |
| Empirical formula                             | $C_{41}H_{32}Mn_2N_2O_5P_2$                                  |
| Formula weight                                | 804.50                                                       |
| Temperature/K                                 | 293(2)                                                       |
| Crystal system                                | monoclinic                                                   |
| Space group                                   | $P2_1/c$                                                     |
| $a/\text{\AA}$                                | 15.6738(3)                                                   |
| $b/\text{\AA}$                                | 9.62622(18)                                                  |
| $c/\text{\AA}$                                | 24.7524(5)                                                   |
| $\alpha/^\circ$                               | 90                                                           |
| $\beta/^\circ$                                | 90.0503(17)                                                  |
| $\gamma/^\circ$                               | 90                                                           |
| Volume/ $\text{\AA}^3$                        | 3734.62(12)                                                  |
| Z                                             | 4                                                            |
| $\rho_{\text{calc}}/\text{g cm}^{-3}$         | 1.431                                                        |
| $\mu/\text{mm}^{-1}$                          | 0.809                                                        |
| F(000)                                        | 1648.0                                                       |
| Crystal size/ $\text{mm}^3$                   | $0.18 \times 0.16 \times 0.14$                               |
| Radiation                                     | MoK $\alpha$ ( $\lambda = 0.71073$ )                         |
| $2\theta$ range for data collection/ $^\circ$ | 6.704 to 52.744                                              |
| Index ranges                                  | $-19 \leq h \leq 17, -10 \leq k \leq 12, -27 \leq l \leq 30$ |

|                                                |                                                                  |
|------------------------------------------------|------------------------------------------------------------------|
| Reflections collected                          | 18551                                                            |
| Independent reflections                        | 7605 [ $R_{\text{int}} = 0.0363$ , $R_{\text{sigma}} = 0.0518$ ] |
| Data/restraints/parameters                     | 7605/0/473                                                       |
| Goodness-of-fit on $F^2$                       | 1.021                                                            |
| Final R indexes [ $I \geq 2\sigma(I)$ ]        | $R_1 = 0.0428$ , $wR_2 = 0.0918$                                 |
| Final R indexes [all data]                     | $R_1 = 0.0634$ , $wR_2 = 0.1011$                                 |
| Largest diff. peak/hole / $e \text{ \AA}^{-3}$ | 0.31/-0.30                                                       |

**Table 8 Bond Lengths for 7b.**

| Atom | Atom | Length/Å | Atom | Atom | Length/Å |
|------|------|----------|------|------|----------|
| C1   | Mn1  | 1.778(4) | C14  | C15  | 1.414(3) |
| C1   | O1   | 1.159(4) | C14  | C35  | 1.515(3) |
| C2   | Mn1  | 1.797(3) | C14  | Mn2  | 2.149(2) |
| C2   | O2   | 1.154(4) | C15  | C36  | 1.499(3) |
| C3   | Mn1  | 1.798(4) | C15  | Mn2  | 2.178(2) |
| C3   | O3   | 1.153(4) | C15  | P2   | 1.783(2) |
| C4   | Mn2  | 1.795(3) | C16  | C17  | 1.383(5) |
| C4   | O4   | 1.140(3) | C16  | C21  | 1.387(4) |
| C5   | Mn2  | 1.787(3) | C17  | C18  | 1.378(5) |
| C5   | O5   | 1.154(3) | C18  | C19  | 1.350(7) |
| C6   | C7   | 1.428(4) | C19  | C20  | 1.360(7) |
| C6   | C16  | 1.482(4) | C20  | C21  | 1.404(5) |
| C6   | Mn1  | 2.188(3) | C24  | C25  | 1.388(4) |
| C6   | P1   | 1.754(2) | C24  | N1   | 1.338(4) |
| C7   | C8   | 1.424(4) | C25  | C26  | 1.386(5) |
| C7   | C22  | 1.510(4) | C26  | C27  | 1.372(6) |
| C7   | Mn1  | 2.154(3) | C27  | C28  | 1.367(5) |
| C8   | C9   | 1.429(3) | C28  | N1   | 1.339(3) |
| C8   | C23  | 1.511(4) | C29  | C30  | 1.372(4) |
| C8   | Mn1  | 2.181(3) | C29  | N2   | 1.334(3) |
| C9   | C10  | 1.522(3) | C30  | C31  | 1.384(4) |
| C9   | Mn1  | 2.224(3) | C31  | C32  | 1.362(5) |
| C9   | P1   | 1.761(3) | C32  | C33  | 1.361(4) |
| C10  | C11  | 1.559(3) | C33  | N2   | 1.344(4) |
| C10  | C24  | 1.530(3) | C36  | C37  | 1.387(3) |
| C11  | C12  | 1.529(3) | C36  | C41  | 1.385(4) |
| C11  | C29  | 1.528(3) | C37  | C38  | 1.393(4) |
| C12  | C13  | 1.430(3) | C38  | C39  | 1.370(4) |
| C12  | Mn2  | 2.174(2) | C39  | C40  | 1.375(4) |
| C12  | P2   | 1.779(2) | C40  | C41  | 1.386(4) |

|     |     |          |     |    |           |
|-----|-----|----------|-----|----|-----------|
| C13 | C14 | 1.437(3) | Mn1 | P1 | 2.3989(8) |
| C13 | C34 | 1.503(3) | Mn2 | P1 | 2.1499(7) |
| C13 | Mn2 | 2.173(2) | Mn2 | P2 | 2.3746(7) |

**Table 9 Bond Angles for 7b.**

| Atom | Atom | Atom | Angle/°    | Atom | Atom | Atom | Angle/°    |
|------|------|------|------------|------|------|------|------------|
| O1   | C1   | Mn1  | 179.2(4)   | C32  | C31  | C30  | 118.9(3)   |
| O2   | C2   | Mn1  | 177.1(3)   | C33  | C32  | C31  | 118.5(3)   |
| O3   | C3   | Mn1  | 179.3(3)   | N2   | C33  | C32  | 123.8(3)   |
| O4   | C4   | Mn2  | 178.7(3)   | C37  | C36  | C15  | 118.5(2)   |
| O5   | C5   | Mn2  | 177.2(2)   | C41  | C36  | C15  | 123.3(2)   |
| C7   | C6   | C16  | 126.0(2)   | C41  | C36  | C37  | 118.1(2)   |
| C7   | C6   | Mn1  | 69.51(15)  | C36  | C37  | C38  | 120.9(3)   |
| C7   | C6   | P1   | 110.90(19) | C39  | C38  | C37  | 119.7(3)   |
| C16  | C6   | Mn1  | 129.5(2)   | C38  | C39  | C40  | 120.4(3)   |
| C16  | C6   | P1   | 122.72(19) | C39  | C40  | C41  | 119.8(3)   |
| P1   | C6   | Mn1  | 74.04(9)   | C40  | C41  | C36  | 121.1(3)   |
| C6   | C7   | C22  | 123.3(3)   | C1   | Mn1  | C2   | 88.99(16)  |
| C6   | C7   | Mn1  | 72.11(16)  | C1   | Mn1  | C3   | 91.85(17)  |
| C8   | C7   | C6   | 112.5(2)   | C1   | Mn1  | C6   | 91.04(13)  |
| C8   | C7   | C22  | 124.1(3)   | C1   | Mn1  | C7   | 97.19(15)  |
| C8   | C7   | Mn1  | 71.86(16)  | C1   | Mn1  | C8   | 131.19(15) |
| C22  | C7   | Mn1  | 125.9(2)   | C1   | Mn1  | C9   | 161.11(13) |
| C7   | C8   | C9   | 113.7(2)   | C1   | Mn1  | P1   | 123.19(11) |
| C7   | C8   | C23  | 122.5(2)   | C2   | Mn1  | C3   | 93.26(16)  |
| C7   | C8   | Mn1  | 69.78(17)  | C2   | Mn1  | C6   | 144.87(15) |
| C9   | C8   | C23  | 123.6(2)   | C2   | Mn1  | C7   | 106.86(15) |
| C9   | C8   | Mn1  | 72.69(16)  | C2   | Mn1  | C8   | 88.32(14)  |
| C23  | C8   | Mn1  | 130.0(2)   | C2   | Mn1  | C9   | 103.90(13) |
| C8   | C9   | C10  | 125.9(2)   | C2   | Mn1  | P1   | 147.76(12) |
| C8   | C9   | Mn1  | 69.47(16)  | C3   | Mn1  | C6   | 121.84(13) |
| C8   | C9   | P1   | 109.95(18) | C3   | Mn1  | C7   | 158.01(13) |
| C10  | C9   | Mn1  | 132.43(18) | C3   | Mn1  | C8   | 136.97(12) |
| C10  | C9   | P1   | 123.30(17) | C3   | Mn1  | C9   | 100.98(12) |
| P1   | C9   | Mn1  | 72.98(9)   | C3   | Mn1  | P1   | 88.01(10)  |
| C9   | C10  | C11  | 113.6(2)   | C6   | Mn1  | C9   | 70.45(9)   |
| C9   | C10  | C24  | 116.4(2)   | C6   | Mn1  | P1   | 44.68(7)   |
| C24  | C10  | C11  | 105.17(19) | C7   | Mn1  | C6   | 38.38(10)  |
| C12  | C11  | C10  | 120.23(19) | C7   | Mn1  | C8   | 38.36(10)  |

|     |     |     |            |     |     |     |            |
|-----|-----|-----|------------|-----|-----|-----|------------|
| C29 | C11 | C10 | 109.41(19) | C7  | Mn1 | C9  | 66.11(10)  |
| C29 | C11 | C12 | 107.79(18) | C7  | Mn1 | P1  | 70.26(7)   |
| C11 | C12 | Mn2 | 131.28(15) | C8  | Mn1 | C6  | 65.75(10)  |
| C11 | C12 | P2  | 117.24(17) | C8  | Mn1 | C9  | 37.84(9)   |
| C13 | C12 | C11 | 128.5(2)   | C8  | Mn1 | P1  | 69.58(7)   |
| C13 | C12 | Mn2 | 70.77(13)  | C9  | Mn1 | P1  | 44.60(6)   |
| C13 | C12 | P2  | 113.78(17) | C4  | Mn2 | C12 | 132.31(11) |
|     | P2  | C12 | 73.07(8)   | C4  | Mn2 | C13 | 162.02(11) |
| C12 | C13 | C14 | 110.7(2)   | C4  | Mn2 | C14 | 128.81(11) |
| C12 | C13 | C34 | 126.4(2)   | C4  | Mn2 | C15 | 96.56(11)  |
| C12 | C13 | Mn2 | 70.81(13)  | C4  | Mn2 | P1  | 97.58(9)   |
| C14 | C13 | C34 | 122.9(2)   | C4  | Mn2 | P2  | 91.62(9)   |
| C14 | C13 | Mn2 | 69.67(13)  | C5  | Mn2 | C4  | 92.82(12)  |
| C34 | C13 | Mn2 | 128.73(17) | C5  | Mn2 | C12 | 134.87(11) |
| C13 | C14 | C35 | 123.0(2)   | C5  | Mn2 | C13 | 98.49(11)  |
| C13 | C14 | Mn2 | 71.49(13)  | C5  | Mn2 | C14 | 87.08(11)  |
| C15 | C14 | C13 | 113.4(2)   | C5  | Mn2 | C15 | 110.56(10) |
| C15 | C14 | C35 | 123.4(2)   | C5  | Mn2 | P1  | 90.56(8)   |
| C15 | C14 | Mn2 | 72.04(13)  | C5  | Mn2 | P2  | 156.40(9)  |
| C35 | C14 | Mn2 | 128.85(17) | C12 | Mn2 | C15 | 70.25(9)   |
| C14 | C15 | C36 | 123.0(2)   | C12 | Mn2 | P2  | 45.79(6)   |
| C14 | C15 | Mn2 | 69.82(13)  | C13 | Mn2 | C12 | 38.42(9)   |
| C14 | C15 | P2  | 112.81(17) | C13 | Mn2 | C15 | 66.40(9)   |
| C36 | C15 | Mn2 | 131.89(17) | C13 | Mn2 | P2  | 72.53(7)   |
| C36 | C15 | P2  | 123.65(18) | C14 | Mn2 | C12 | 66.14(9)   |
|     | P2  | C15 | 72.89(8)   | C14 | Mn2 | C13 | 38.84(9)   |
| C17 | C16 | C6  | 122.2(3)   | C14 | Mn2 | C15 | 38.14(9)   |
| C17 | C16 | C21 | 118.2(3)   | C14 | Mn2 | P1  | 133.61(7)  |
| C21 | C16 | C6  | 119.5(3)   | C14 | Mn2 | P2  | 72.19(7)   |
| C18 | C17 | C16 | 121.4(4)   | C15 | Mn2 | P2  | 45.87(7)   |
| C19 | C18 | C17 | 119.8(5)   | P1  | Mn2 | C12 | 84.03(6)   |
| C18 | C19 | C20 | 120.9(4)   | P1  | Mn2 | C13 | 96.25(7)   |
| C19 | C20 | C21 | 120.1(5)   | P1  | Mn2 | C15 | 153.89(7)  |
| C16 | C21 | C20 | 119.6(4)   | P1  | Mn2 | P2  | 111.80(3)  |
| C25 | C24 | C10 | 121.2(3)   | C24 | N1  | C28 | 117.3(3)   |
| N1  | C24 | C10 | 116.1(2)   | C29 | N2  | C33 | 117.2(3)   |
| N1  | C24 | C25 | 122.4(3)   | C6  | P1  | C9  | 92.75(12)  |
| C26 | C25 | C24 | 118.8(3)   | C6  | P1  | Mn1 | 61.29(9)   |
| C27 | C26 | C25 | 119.0(3)   | C6  | P1  | Mn2 | 135.76(9)  |
| C28 | C27 | C26 | 118.5(3)   | C9  | P1  | Mn1 | 62.43(9)   |

|     |     |     |          |     |    |     |           |
|-----|-----|-----|----------|-----|----|-----|-----------|
| N1  | C28 | C27 | 124.0(4) | C9  | P1 | Mn2 | 128.79(9) |
| C30 | C29 | C11 | 121.5(2) | Mn2 | P1 | Mn1 | 145.86(4) |
| N2  | C29 | C11 | 116.3(2) | C12 | P2 | C15 | 89.31(11) |
| N2  | C29 | C30 | 122.2(2) | C12 | P2 | Mn2 | 61.14(7)  |
| C29 | C30 | C31 | 119.2(3) | C15 | P2 | Mn2 | 61.24(8)  |

### X-ray crystallographic studies of compound **8a**

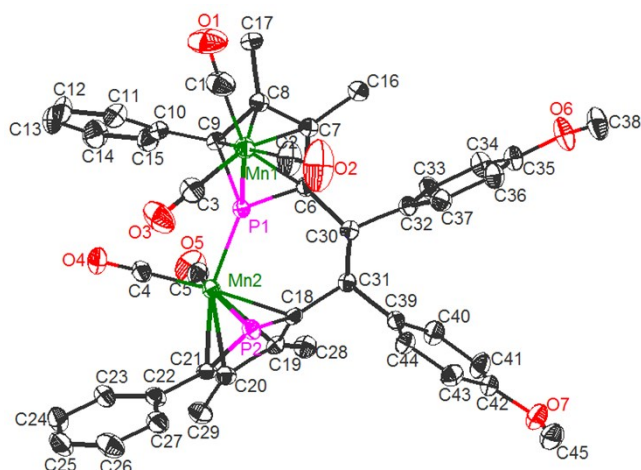

**Table 10 Crystal data and structure refinement for **8a**.**

|                                    |                                            |
|------------------------------------|--------------------------------------------|
| Identification code                | <b>8a</b>                                  |
| Empirical formula                  | $C_{45}H_{38}Mn_2O_7P_2$                   |
| Formula weight                     | 862.57                                     |
| Temperature/K                      | 293(2)                                     |
| Crystal system                     | monoclinic                                 |
| Space group                        | $P2_1/c$                                   |
| $a/\text{\AA}$                     | 10.67365(18)                               |
| $b/\text{\AA}$                     | 14.2261(3)                                 |
| $c/\text{\AA}$                     | 26.7140(5)                                 |
| $\alpha/^\circ$                    | 90                                         |
| $\beta/^\circ$                     | 93.5276(15)                                |
| $\gamma/^\circ$                    | 90                                         |
| Volume/ $\text{\AA}^3$             | 4048.67(13)                                |
| Z                                  | 4                                          |
| $\rho_{\text{calc}}/\text{g/cm}^3$ | 1.415                                      |
| $\mu/\text{mm}^{-1}$               | 6.240                                      |
| F(000)                             | 1776.0                                     |
| Crystal size/ $\text{mm}^3$        | $0.17 \times 0.07 \times 0.06$             |
| Radiation                          | $\text{CuK}\alpha$ ( $\lambda = 1.54184$ ) |

|                                                  |                                                                   |
|--------------------------------------------------|-------------------------------------------------------------------|
| 2 $\theta$ range for data collection/ $^{\circ}$ | 6.63 to 134.15                                                    |
| Index ranges                                     | $-9 \leq h \leq 12$ , $-16 \leq k \leq 16$ , $-31 \leq l \leq 28$ |
| Reflections collected                            | 16980                                                             |
| Independent reflections                          | 7210 [ $R_{\text{int}} = 0.0450$ , $R_{\text{sigma}} = 0.0827$ ]  |
| Data/restraints/parameters                       | 7210/0/511                                                        |
| Goodness-of-fit on $F^2$                         | 1.021                                                             |
| Final R indexes [ $I \geq 2\sigma(I)$ ]          | $R_1 = 0.0536$ , $wR_2 = 0.1114$                                  |
| Final R indexes [all data]                       | $R_1 = 0.0891$ , $wR_2 = 0.1232$                                  |
| Largest diff. peak/hole / $e \text{ \AA}^{-3}$   | 0.50/-0.29                                                        |

**Table 11 Bond Lengths for 8a.**

| Atom | Atom | Length/ $\text{\AA}$ | Atom | Atom | Length/ $\text{\AA}$ |
|------|------|----------------------|------|------|----------------------|
| C1   | Mn1  | 1.793(6)             | C19  | Mn2  | 2.151(4)             |
| C1   | O1   | 1.156(6)             | C20  | C21  | 1.407(6)             |
| C2   | Mn1  | 1.786(6)             | C20  | C29  | 1.515(5)             |
| C2   | O2   | 1.133(6)             | C20  | Mn2  | 2.148(4)             |
| C3   | Mn1  | 1.798(5)             | C21  | C22  | 1.487(5)             |
| C3   | O3   | 1.136(5)             | C21  | Mn2  | 2.184(4)             |
| C4   | Mn2  | 1.802(5)             | C21  | P2   | 1.800(4)             |
| C4   | O4   | 1.143(5)             | C22  | C23  | 1.394(6)             |
| C5   | Mn2  | 1.785(5)             | C22  | C27  | 1.379(6)             |
| C5   | O5   | 1.144(5)             | C23  | C24  | 1.375(6)             |
| C6   | C7   | 1.431(5)             | C24  | C25  | 1.389(7)             |
| C6   | C30  | 1.549(5)             | C25  | C26  | 1.358(7)             |
| C6   | Mn1  | 2.197(4)             | C26  | C27  | 1.392(6)             |
| C6   | P1   | 1.747(4)             | C30  | C31  | 1.571(5)             |
| C7   | C8   | 1.430(6)             | C30  | C32  | 1.520(5)             |
| C7   | C16  | 1.519(5)             | C31  | C39  | 1.526(5)             |
| C7   | Mn1  | 2.132(4)             | C32  | C33  | 1.390(6)             |
| C8   | C9   | 1.421(5)             | C32  | C37  | 1.372(6)             |
| C8   | C17  | 1.508(5)             | C33  | C34  | 1.381(6)             |
| C8   | Mn1  | 2.150(4)             | C34  | C35  | 1.370(6)             |
| C9   | C10  | 1.499(5)             | C35  | C36  | 1.373(7)             |
| C9   | Mn1  | 2.181(4)             | C35  | O6   | 1.371(5)             |
| C9   | P1   | 1.744(4)             | C36  | C37  | 1.410(6)             |
| C10  | C11  | 1.378(6)             | C38  | O6   | 1.410(6)             |
| C10  | C15  | 1.374(7)             | C39  | C40  | 1.381(6)             |
| C11  | C12  | 1.392(7)             | C39  | C44  | 1.377(6)             |
| C12  | C13  | 1.365(8)             | C40  | C41  | 1.381(6)             |

|     |     |          |     |     |            |
|-----|-----|----------|-----|-----|------------|
| C13 | C14 | 1.358(8) | C41 | C42 | 1.380(6)   |
| C14 | C15 | 1.380(6) | C42 | C43 | 1.372(6)   |
| C18 | C19 | 1.412(5) | C42 | O7  | 1.374(5)   |
| C18 | C31 | 1.522(5) | C43 | C44 | 1.396(5)   |
| C18 | Mn2 | 2.168(4) | C45 | O7  | 1.402(6)   |
| C18 | P2  | 1.796(4) | Mn1 | P1  | 2.4025(13) |
| C19 | C20 | 1.442(5) | Mn2 | P1  | 2.1326(12) |
| C19 | C28 | 1.505(6) | Mn2 | P2  | 2.3773(13) |

**Table 12 Bond Angles for 8a.**

| Atom | Atom | Atom | Angle/°   | Atom | Atom | Atom | Angle/°    |
|------|------|------|-----------|------|------|------|------------|
| O1   | C1   | Mn1  | 176.5(5)  | C34  | C35  | O6   | 115.4(5)   |
| O2   | C2   | Mn1  | 178.6(6)  | O6   | C35  | C36  | 124.7(5)   |
| O3   | C3   | Mn1  | 179.8(6)  | C35  | C36  | C37  | 119.7(4)   |
| O4   | C4   | Mn2  | 179.3(5)  | C32  | C37  | C36  | 121.0(5)   |
| O5   | C5   | Mn2  | 176.1(5)  | C40  | C39  | C31  | 120.1(4)   |
| C7   | C6   | C30  | 130.1(3)  | C44  | C39  | C31  | 122.7(4)   |
| C7   | C6   | Mn1  | 68.3(2)   | C44  | C39  | C40  | 117.2(4)   |
| C7   | C6   | P1   | 110.2(3)  | C41  | C40  | C39  | 121.8(5)   |
| C30  | C6   | Mn1  | 127.0(3)  | C42  | C41  | C40  | 119.9(5)   |
| C30  | C6   | P1   | 119.6(3)  | C43  | C42  | C41  | 119.9(4)   |
| P1   | C6   | Mn1  | 74.07(14) | C43  | C42  | O7   | 125.0(4)   |
| C6   | C7   | C16  | 127.7(4)  | O7   | C42  | C41  | 115.0(4)   |
| C6   | C7   | Mn1  | 73.2(2)   | C42  | C43  | C44  | 119.0(4)   |
| C8   | C7   | C6   | 112.5(3)  | C39  | C44  | C43  | 122.2(4)   |
| C8   | C7   | C16  | 119.8(4)  | C1   | Mn1  | C3   | 95.5(2)    |
| C8   | C7   | Mn1  | 71.1(2)   | C1   | Mn1  | C6   | 145.3(2)   |
| C16  | C7   | Mn1  | 124.8(3)  | C1   | Mn1  | C7   | 106.9(2)   |
| C7   | C8   | C17  | 124.7(4)  | C1   | Mn1  | C8   | 87.0(2)    |
| C7   | C8   | Mn1  | 69.8(3)   | C1   | Mn1  | C9   | 102.1(2)   |
| C9   | C8   | C7   | 113.4(4)  | C1   | Mn1  | P1   | 145.8(2)   |
| C9   | C8   | C17  | 121.8(4)  | C2   | Mn1  | C1   | 90.9(3)    |
| C9   | C8   | Mn1  | 72.0(2)   | C2   | Mn1  | C3   | 90.8(3)    |
| C17  | C8   | Mn1  | 129.3(3)  | C2   | Mn1  | C6   | 89.9(2)    |
| C8   | C9   | C10  | 128.0(4)  | C2   | Mn1  | C7   | 95.1(2)    |
| C8   | C9   | Mn1  | 69.7(2)   | C2   | Mn1  | C8   | 129.6(2)   |
| C8   | C9   | P1   | 110.1(3)  | C2   | Mn1  | C9   | 160.3(2)   |
| C10  | C9   | Mn1  | 129.5(3)  | C2   | Mn1  | P1   | 123.1(2)   |
| C10  | C9   | P1   | 121.3(3)  | C3   | Mn1  | C6   | 119.12(19) |

|     |     |     |           |     |     |     |            |
|-----|-----|-----|-----------|-----|-----|-----|------------|
| P1  | C9  | Mn1 | 74.55(15) | C3  | Mn1 | C7  | 156.64(19) |
| C11 | C10 | C9  | 122.3(5)  | C3  | Mn1 | C8  | 139.6(2)   |
| C15 | C10 | C9  | 118.9(4)  | C3  | Mn1 | C9  | 102.6(2)   |
| C15 | C10 | C11 | 118.7(5)  | C3  | Mn1 | P1  | 87.80(16)  |
| C10 | C11 | C12 | 119.8(6)  | C6  | Mn1 | P1  | 44.36(10)  |
| C13 | C12 | C11 | 120.8(6)  | C7  | Mn1 | C6  | 38.55(14)  |
| C14 | C13 | C12 | 119.3(5)  | C7  | Mn1 | C8  | 39.01(15)  |
| C13 | C14 | C15 | 120.6(6)  | C7  | Mn1 | C9  | 67.03(16)  |
| C10 | C15 | C14 | 120.8(6)  | C7  | Mn1 | P1  | 70.05(11)  |
| C19 | C18 | C31 | 121.3(4)  | C8  | Mn1 | C6  | 66.33(16)  |
| C19 | C18 | Mn2 | 70.3(2)   | C8  | Mn1 | C9  | 38.29(14)  |
| C19 | C18 | P2  | 112.1(3)  | C8  | Mn1 | P1  | 69.43(11)  |
| C31 | C18 | Mn2 | 128.1(3)  | C9  | Mn1 | C6  | 70.95(15)  |
| C31 | C18 | P2  | 126.4(3)  | C9  | Mn1 | P1  | 44.41(10)  |
| P2  | C18 | Mn2 | 73.01(14) | C4  | Mn2 | C18 | 150.22(19) |
| C18 | C19 | C20 | 113.2(4)  | C4  | Mn2 | C19 | 154.56(17) |
| C18 | C19 | C28 | 124.9(4)  | C4  | Mn2 | C20 | 115.38(18) |
| C18 | C19 | Mn2 | 71.6(2)   | C4  | Mn2 | C21 | 92.93(18)  |
| C20 | C19 | C28 | 121.9(4)  | C4  | Mn2 | P1  | 92.35(14)  |
| C20 | C19 | Mn2 | 70.3(2)   | C4  | Mn2 | P2  | 104.59(16) |
| C28 | C19 | Mn2 | 128.5(3)  | C5  | Mn2 | C4  | 92.4(2)    |
| C19 | C20 | C29 | 122.0(4)  | C5  | Mn2 | C18 | 117.35(19) |
| C19 | C20 | Mn2 | 70.5(2)   | C5  | Mn2 | C19 | 88.87(19)  |
| C21 | C20 | C19 | 112.3(4)  | C5  | Mn2 | C20 | 92.70(19)  |
| C21 | C20 | C29 | 125.3(4)  | C5  | Mn2 | C21 | 125.65(18) |
| C21 | C20 | Mn2 | 72.5(2)   | C5  | Mn2 | P1  | 94.03(15)  |
| C29 | C20 | Mn2 | 130.0(3)  | C5  | Mn2 | P2  | 160.94(16) |
| C20 | C21 | C22 | 126.3(4)  | C18 | Mn2 | C21 | 71.17(14)  |
| C20 | C21 | Mn2 | 69.6(2)   | C18 | Mn2 | P2  | 46.27(11)  |
| C20 | C21 | P2  | 112.7(3)  | C19 | Mn2 | C18 | 38.15(14)  |
| C22 | C21 | Mn2 | 125.2(3)  | C19 | Mn2 | C21 | 66.17(16)  |
| C22 | C21 | P2  | 121.0(3)  | C19 | Mn2 | P2  | 72.07(12)  |
| P2  | C21 | Mn2 | 72.54(13) | C20 | Mn2 | C18 | 67.00(14)  |
| C23 | C22 | C21 | 123.0(4)  | C20 | Mn2 | C19 | 39.20(15)  |
| C27 | C22 | C21 | 119.4(4)  | C20 | Mn2 | C21 | 37.89(16)  |
| C27 | C22 | C23 | 117.6(4)  | C20 | Mn2 | P2  | 72.39(12)  |
| C24 | C23 | C22 | 121.2(5)  | C21 | Mn2 | P2  | 46.24(11)  |
| C23 | C24 | C25 | 119.9(5)  | P1  | Mn2 | C18 | 85.04(10)  |
| C26 | C25 | C24 | 119.7(5)  | P1  | Mn2 | C19 | 112.91(11) |
| C25 | C26 | C27 | 120.2(5)  | P1  | Mn2 | C20 | 151.13(12) |



|     |     |     |          |     |     |     |            |
|-----|-----|-----|----------|-----|-----|-----|------------|
| C22 | C27 | C26 | 121.3(5) | P1  | Mn2 | C21 | 139.64(11) |
| C6  | C30 | C31 | 112.0(3) | P1  | Mn2 | P2  | 93.84(4)   |
| C32 | C30 | C6  | 111.7(3) | C35 | O6  | C38 | 117.8(4)   |
| C32 | C30 | C31 | 109.0(3) | C42 | O7  | C45 | 119.5(4)   |
| C18 | C31 | C30 | 117.5(3) | C6  | P1  | Mn1 | 61.57(14)  |
| C18 | C31 | C39 | 109.1(3) | C6  | P1  | Mn2 | 130.57(14) |
| C39 | C31 | C30 | 110.2(3) | C9  | P1  | C6  | 93.42(19)  |
| C33 | C32 | C30 | 119.9(4) | C9  | P1  | Mn1 | 61.04(14)  |
| C37 | C32 | C30 | 122.3(4) | C9  | P1  | Mn2 | 135.86(14) |
| C37 | C32 | C33 | 117.7(4) | Mn2 | P1  | Mn1 | 137.43(6)  |
| C34 | C33 | C32 | 121.7(4) | C18 | P2  | C21 | 89.54(19)  |
| C35 | C34 | C33 | 120.0(5) | C18 | P2  | Mn2 | 60.72(12)  |
| C34 | C35 | C36 | 119.9(4) | C21 | P2  | Mn2 | 61.22(13)  |

### X-ray crystallographic studies of compound 9

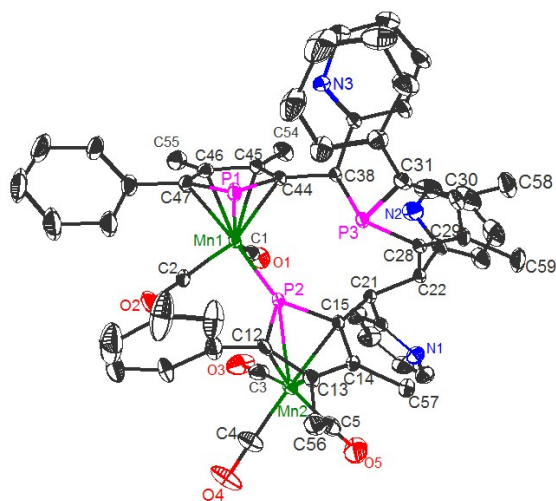

**Table 13 Crystal data and structure refinement for 9.**

|                     |                                                                                              |
|---------------------|----------------------------------------------------------------------------------------------|
| Identification code | 9                                                                                            |
| Empirical formula   | C <sub>59</sub> H <sub>48</sub> N <sub>3</sub> O <sub>5</sub> P <sub>3</sub> Mn <sub>2</sub> |
| Formula weight      | 1081.79                                                                                      |
| Temperature/K       | 273.15                                                                                       |

|                                             |                                                                |
|---------------------------------------------|----------------------------------------------------------------|
| Crystal system                              | triclinic                                                      |
| Space group                                 | P-1                                                            |
| a/Å                                         | 12.0038(6)                                                     |
| b/Å                                         | 13.6029(7)                                                     |
| c/Å                                         | 18.5921(10)                                                    |
| $\alpha$ /°                                 | 102.356(3)                                                     |
| $\beta$ /°                                  | 97.645(3)                                                      |
| $\gamma$ /°                                 | 113.816(3)                                                     |
| Volume/Å <sup>3</sup>                       | 2629.9(2)                                                      |
| Z                                           | 2                                                              |
| $\rho_{\text{calc}}$ /g/cm <sup>3</sup>     | 1.366                                                          |
| $\mu$ /mm <sup>-1</sup>                     | 0.624                                                          |
| F(000)                                      | 1116.0                                                         |
| Crystal size/mm <sup>3</sup>                | 0.5 × 0.4 × 0.3                                                |
| Radiation                                   | MoK $\alpha$ ( $\lambda$ = 0.71073)                            |
| 2 $\theta$ range for data collection/°      | 4.44 to 55.42                                                  |
| Index ranges                                | -15 ≤ h ≤ 15, -17 ≤ k ≤ 17, -24 ≤ l ≤ 24                       |
| Reflections collected                       | 47201                                                          |
| Independent reflections                     | 12195 [R <sub>int</sub> = 0.0848, R <sub>sigma</sub> = 0.1035] |
| Data/restraints/parameters                  | 12195/0/656                                                    |
| Goodness-of-fit on F <sup>2</sup>           | 1.055                                                          |
| Final R indexes [I ≥ 2 $\sigma$ (I)]        | R <sub>1</sub> = 0.0746, wR <sub>2</sub> = 0.1637              |
| Final R indexes [all data]                  | R <sub>1</sub> = 0.1343, wR <sub>2</sub> = 0.1823              |
| Largest diff. peak/hole / e Å <sup>-3</sup> | 0.96/-0.65                                                     |

**Table 14 Bond Lengths for 9.**

| Atom | Atom | Length/Å   | Atom | Atom | Length/Å |
|------|------|------------|------|------|----------|
| Mn1  | P2   | 2.1809(11) | C30  | C31  | 1.363(6) |
| Mn1  | P1   | 2.3886(14) | C30  | C58  | 1.510(6) |
| Mn1  | C2   | 1.780(4)   | C23  | C22  | 1.520(6) |
| Mn1  | C47  | 2.188(4)   | C23  | N2   | 1.331(6) |
| Mn1  | C45  | 2.186(4)   | C23  | C24  | 1.389(7) |
| Mn1  | C44  | 2.204(4)   | C45  | C44  | 1.395(6) |
| Mn1  | C46  | 2.157(4)   | C45  | C46  | 1.444(6) |
| Mn1  | C1   | 1.778(6)   | C45  | C54  | 1.512(6) |
| Mn2  | P2   | 2.4099(12) | C46  | C55  | 1.497(6) |
| Mn2  | C13  | 2.149(5)   | C20  | N1   | 1.337(5) |
| Mn2  | C14  | 2.160(4)   | C20  | C19  | 1.375(7) |
| Mn2  | C15  | 2.200(4)   | C1   | O1   | 1.151(6) |
| Mn2  | C4   | 1.788(5)   | C48  | C49  | 1.384(7) |

|     |     |          |     |     |           |
|-----|-----|----------|-----|-----|-----------|
| Mn2 | C12 | 2.195(5) | C48 | C53 | 1.378(8)  |
| Mn2 | C3  | 1.785(6) | C4  | O4  | 1.132(6)  |
| Mn2 | C5  | 1.811(6) | C16 | C17 | 1.362(8)  |
| P3  | C28 | 1.804(4) | C16 | N1  | 1.335(7)  |
| P3  | C38 | 1.885(4) | C37 | C36 | 1.375(8)  |
| P3  | C31 | 1.800(4) | C12 | C11 | 1.489(6)  |
| P2  | C15 | 1.765(4) | C3  | O3  | 1.145(6)  |
| P2  | C12 | 1.759(4) | C11 | C10 | 1.377(7)  |
| P1  | C47 | 1.786(4) | C11 | C6  | 1.385(8)  |
| P1  | C44 | 1.781(4) | C17 | C18 | 1.358(8)  |
| C21 | C15 | 1.519(6) | C5  | O5  | 1.151(7)  |
| C21 | C20 | 1.521(6) | C49 | C50 | 1.392(9)  |
| C21 | C22 | 1.563(5) | C43 | C42 | 1.335(7)  |
| C2  | O2  | 1.152(5) | C43 | N3  | 1.345(6)  |
| C47 | C46 | 1.407(7) | C53 | C52 | 1.391(8)  |
| C47 | C48 | 1.492(6) | C51 | C50 | 1.338(11) |
| C13 | C14 | 1.421(6) | C51 | C52 | 1.351(11) |
| C13 | C12 | 1.425(6) | C41 | C42 | 1.352(8)  |
| C13 | C56 | 1.511(6) | C41 | C40 | 1.378(7)  |
| C32 | C31 | 1.471(6) | C36 | C35 | 1.398(10) |
| C32 | C37 | 1.400(7) | C10 | C9  | 1.406(10) |
| C32 | C33 | 1.400(7) | C27 | C26 | 1.365(10) |
| C28 | C29 | 1.348(6) | C27 | N2  | 1.340(7)  |
| C28 | C22 | 1.515(6) | C9  | C8  | 1.332(12) |
| C14 | C15 | 1.435(6) | C33 | C34 | 1.372(9)  |
| C14 | C57 | 1.510(6) | C34 | C35 | 1.372(10) |
| C38 | C39 | 1.512(5) | C26 | C25 | 1.376(10) |
| C38 | C44 | 1.516(5) | C6  | C7  | 1.387(8)  |
| C39 | N3  | 1.316(5) | C25 | C24 | 1.369(8)  |
| C39 | C40 | 1.397(6) | C8  | C7  | 1.383(12) |
| C29 | C30 | 1.456(6) | C18 | C19 | 1.381(8)  |
| C29 | C59 | 1.517(6) |     |     |           |

**Table 15 Bond Angles for 9.**

| Atom | Atom | Atom | Angle/°    | Atom | Atom | Atom | Angle/°  |
|------|------|------|------------|------|------|------|----------|
| P2   | Mn1  | P1   | 90.58(5)   | C57  | C14  | Mn2  | 128.4(3) |
| P2   | Mn1  | C47  | 131.22(13) | C39  | C38  | P3   | 112.6(3) |
| P2   | Mn1  | C45  | 128.46(11) | C39  | C38  | C44  | 112.7(3) |
| P2   | Mn1  | C44  | 96.48(10)  | C44  | C38  | P3   | 111.2(3) |

|     |     |     |            |     |     |     |           |
|-----|-----|-----|------------|-----|-----|-----|-----------|
| C2  | Mn1 | P2  | 91.84(14)  | N3  | C39 | C38 | 118.4(3)  |
| C2  | Mn1 | P1  | 113.66(15) | N3  | C39 | C40 | 121.7(4)  |
| C2  | Mn1 | C47 | 89.26(17)  | C40 | C39 | C38 | 119.9(4)  |
| C2  | Mn1 | C45 | 139.70(17) | C28 | C29 | C30 | 115.2(4)  |
| C2  | Mn1 | C44 | 157.28(19) | C28 | C29 | C59 | 124.0(4)  |
| C2  | Mn1 | C46 | 102.25(18) | C30 | C29 | C59 | 120.8(4)  |
| C47 | Mn1 | P1  | 45.68(12)  | C29 | C30 | C58 | 121.4(4)  |
| C47 | Mn1 | C44 | 69.39(15)  | C31 | C30 | C29 | 114.2(4)  |
| C45 | Mn1 | P1  | 70.93(12)  | C31 | C30 | C58 | 124.3(4)  |
| C45 | Mn1 | C47 | 65.10(17)  | N2  | C23 | C22 | 116.7(4)  |
| C45 | Mn1 | C44 | 37.07(15)  | N2  | C23 | C24 | 122.5(5)  |
| C44 | Mn1 | P1  | 45.40(12)  | C24 | C23 | C22 | 120.8(4)  |
| C46 | Mn1 | P2  | 160.86(12) | C44 | C45 | Mn1 | 72.2(2)   |
| C46 | Mn1 | P1  | 72.00(13)  | C44 | C45 | C46 | 113.0(4)  |
| C46 | Mn1 | C47 | 37.78(18)  | C44 | C45 | C54 | 123.6(4)  |
| C46 | Mn1 | C45 | 38.84(16)  | C46 | C45 | Mn1 | 69.5(2)   |
| C46 | Mn1 | C44 | 65.76(15)  | C46 | C45 | C54 | 123.4(4)  |
| C1  | Mn1 | P2  | 96.30(14)  | C54 | C45 | Mn1 | 128.8(3)  |
| C1  | Mn1 | P1  | 155.66(14) | C32 | C31 | P3  | 122.7(3)  |
| C1  | Mn1 | C2  | 89.5(2)    | C30 | C31 | P3  | 108.6(3)  |
| C1  | Mn1 | C47 | 132.48(19) | C30 | C31 | C32 | 128.2(4)  |
| C1  | Mn1 | C45 | 86.68(19)  | P1  | C44 | Mn1 | 72.79(13) |
| C1  | Mn1 | C44 | 110.44(18) | C38 | C44 | Mn1 | 129.5(3)  |
| C1  | Mn1 | C46 | 96.7(2)    | C38 | C44 | P1  | 124.5(3)  |
| C13 | Mn2 | P2  | 70.17(12)  | C45 | C44 | Mn1 | 70.8(2)   |
| C13 | Mn2 | C14 | 38.51(16)  | C45 | C44 | P1  | 113.2(3)  |
| C13 | Mn2 | C15 | 66.06(16)  | C45 | C44 | C38 | 122.1(4)  |
| C13 | Mn2 | C12 | 38.28(16)  | P2  | C15 | Mn2 | 73.94(13) |
| C14 | Mn2 | P2  | 70.49(11)  | C21 | C15 | Mn2 | 131.5(3)  |
| C14 | Mn2 | C15 | 38.42(15)  | C21 | C15 | P2  | 119.9(3)  |
| C14 | Mn2 | C12 | 66.30(15)  | C14 | C15 | Mn2 | 69.3(2)   |
| C15 | Mn2 | P2  | 44.74(10)  | C14 | C15 | P2  | 111.1(3)  |
| C4  | Mn2 | P2  | 129.3(2)   | C14 | C15 | C21 | 128.3(3)  |
| C4  | Mn2 | C13 | 94.1(2)    | C47 | C46 | Mn1 | 72.3(2)   |
| C4  | Mn2 | C14 | 124.9(2)   | C47 | C46 | C45 | 111.2(4)  |
| C4  | Mn2 | C15 | 160.1(2)   | C47 | C46 | C55 | 125.4(4)  |
| C4  | Mn2 | C12 | 93.4(2)    | C45 | C46 | Mn1 | 71.6(2)   |
| C4  | Mn2 | C5  | 88.7(3)    | C45 | C46 | C55 | 123.2(5)  |
| C12 | Mn2 | P2  | 44.61(11)  | C55 | C46 | Mn1 | 125.8(3)  |
| C12 | Mn2 | C15 | 70.44(15)  | N1  | C20 | C21 | 117.2(4)  |

|     |     |     |            |     |     |     |           |
|-----|-----|-----|------------|-----|-----|-----|-----------|
| C3  | Mn2 | P2  | 87.00(16)  | N1  | C20 | C19 | 122.0(4)  |
| C3  | Mn2 | C13 | 154.7(2)   | C19 | C20 | C21 | 120.7(4)  |
| C3  | Mn2 | C14 | 143.1(2)   | C28 | C22 | C21 | 116.7(3)  |
| C3  | Mn2 | C15 | 105.47(19) | C28 | C22 | C23 | 111.1(3)  |
| C3  | Mn2 | C4  | 92.0(3)    | C23 | C22 | C21 | 107.1(3)  |
| C3  | Mn2 | C12 | 116.8(2)   | O1  | C1  | Mn1 | 175.1(4)  |
| C3  | Mn2 | C5  | 92.4(3)    | C49 | C48 | C47 | 121.2(5)  |
| C5  | Mn2 | P2  | 141.97(17) | C53 | C48 | C47 | 120.4(4)  |
| C5  | Mn2 | C13 | 112.2(2)   | C53 | C48 | C49 | 118.1(5)  |
| C5  | Mn2 | C14 | 88.5(2)    | O4  | C4  | Mn2 | 177.5(6)  |
| C5  | Mn2 | C15 | 99.67(19)  | N1  | C16 | C17 | 123.9(5)  |
| C5  | Mn2 | C12 | 150.5(2)   | C36 | C37 | C32 | 121.0(5)  |
| C28 | P3  | C38 | 105.62(19) | P2  | C12 | Mn2 | 74.18(17) |
| C31 | P3  | C28 | 91.8(2)    | C13 | C12 | Mn2 | 69.1(3)   |
| C31 | P3  | C38 | 109.46(18) | C13 | C12 | P2  | 110.9(3)  |
| Mn1 | P2  | Mn2 | 137.18(5)  | C13 | C12 | C11 | 124.9(4)  |
| C15 | P2  | Mn1 | 135.95(14) | C11 | C12 | Mn2 | 133.8(3)  |
| C15 | P2  | Mn2 | 61.32(13)  | C11 | C12 | P2  | 123.0(3)  |
| C12 | P2  | Mn1 | 131.86(15) | O3  | C3  | Mn2 | 178.3(4)  |
| C12 | P2  | Mn2 | 61.22(15)  | C10 | C11 | C12 | 124.7(6)  |
| C12 | P2  | C15 | 91.99(19)  | C10 | C11 | C6  | 119.1(5)  |
| C47 | P1  | Mn1 | 61.23(15)  | C6  | C11 | C12 | 116.0(5)  |
| C44 | P1  | Mn1 | 61.80(13)  | C18 | C17 | C16 | 118.2(6)  |
| C44 | P1  | C47 | 89.0(2)    | O5  | C5  | Mn2 | 178.6(6)  |
| C15 | C21 | C20 | 115.5(3)   | C48 | C49 | C50 | 120.4(7)  |
| C15 | C21 | C22 | 113.8(3)   | C42 | C43 | N3  | 123.7(5)  |
| C20 | C21 | C22 | 108.4(3)   | C48 | C53 | C52 | 120.1(6)  |
| O2  | C2  | Mn1 | 177.4(4)   | C50 | C51 | C52 | 120.4(6)  |
| P1  | C47 | Mn1 | 73.09(14)  | C42 | C41 | C40 | 118.7(5)  |
| C46 | C47 | Mn1 | 69.9(2)    | C37 | C36 | C35 | 120.3(6)  |
| C46 | C47 | P1  | 113.5(3)   | C43 | C42 | C41 | 119.6(5)  |
| C46 | C47 | C48 | 126.6(4)   | C11 | C10 | C9  | 118.7(7)  |
| C48 | C47 | Mn1 | 129.4(3)   | N2  | C27 | C26 | 123.6(6)  |
| C48 | C47 | P1  | 119.7(4)   | C8  | C9  | C10 | 121.3(7)  |
| C14 | C13 | Mn2 | 71.1(3)    | C34 | C33 | C32 | 121.5(6)  |
| C14 | C13 | C12 | 113.6(4)   | C33 | C34 | C35 | 120.6(6)  |
| C14 | C13 | C56 | 123.4(4)   | C27 | C26 | C25 | 118.5(6)  |
| C12 | C13 | Mn2 | 72.6(3)    | C34 | C35 | C36 | 119.2(6)  |
| C12 | C13 | C56 | 122.9(4)   | C11 | C6  | C7  | 121.4(7)  |
| C56 | C13 | Mn2 | 127.0(3)   | C24 | C25 | C26 | 119.2(6)  |

|     |     |     |          |     |     |     |          |
|-----|-----|-----|----------|-----|-----|-----|----------|
| C37 | C32 | C31 | 120.7(4) | C9  | C8  | C7  | 121.2(8) |
| C33 | C32 | C31 | 121.7(4) | C17 | C18 | C19 | 119.4(6) |
| C33 | C32 | C37 | 117.4(5) | C8  | C7  | C6  | 118.1(8) |
| C29 | C28 | P3  | 108.5(3) | C51 | C50 | C49 | 120.4(7) |
| C29 | C28 | C22 | 124.2(4) | C51 | C52 | C53 | 120.5(8) |
| C22 | C28 | P3  | 127.1(3) | C16 | N1  | C20 | 117.4(4) |
| C13 | C14 | Mn2 | 70.3(2)  | C39 | N3  | C43 | 117.6(4) |
| C13 | C14 | C15 | 112.2(3) | C23 | N2  | C27 | 117.4(5) |
| C13 | C14 | C57 | 122.7(4) | C41 | C40 | C39 | 118.6(5) |
| C15 | C14 | Mn2 | 72.3(2)  | C20 | C19 | C18 | 118.9(5) |
| C15 | C14 | C57 | 124.9(4) | C25 | C24 | C23 | 118.8(6) |

## NMR spectrums

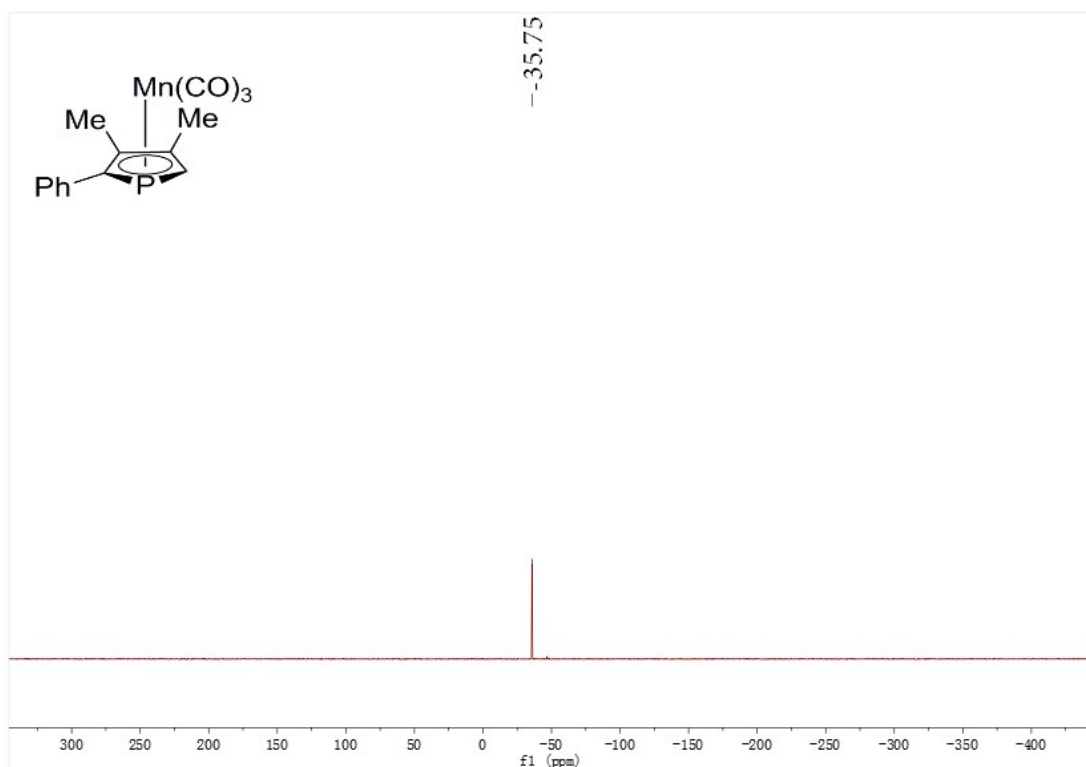

$^{31}\text{P}\{^1\text{H}\}$  (CDCl<sub>3</sub>, 121 MHz) NMR of **3**

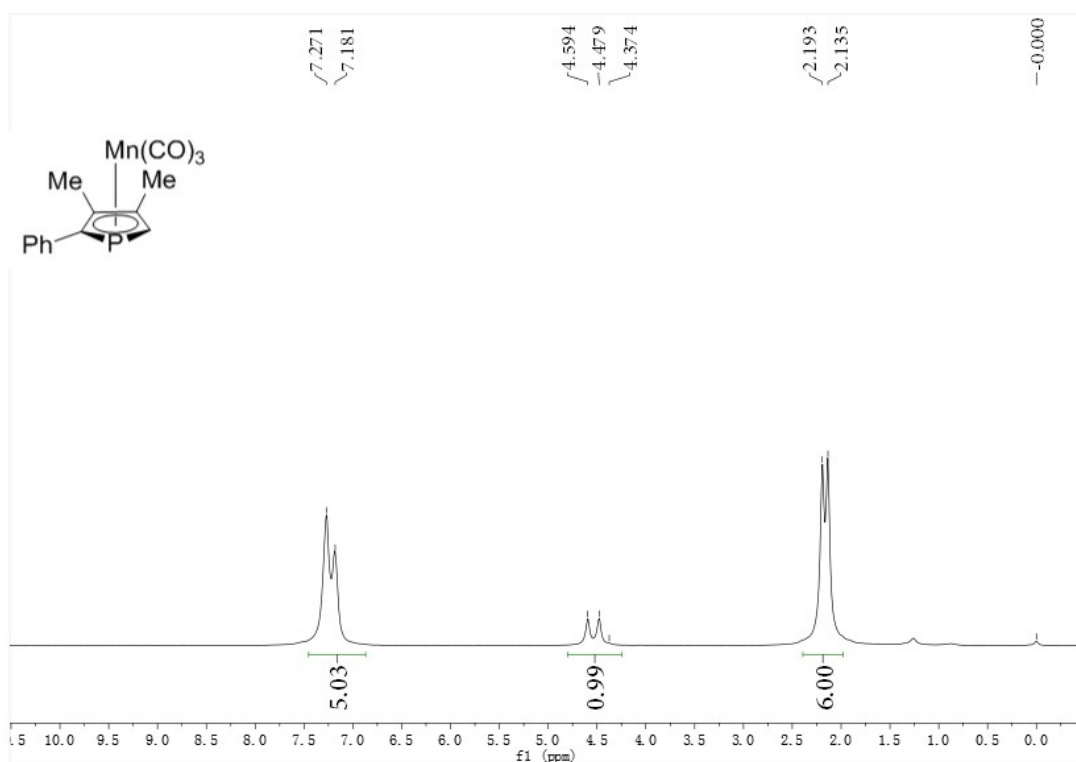

$^1\text{H}$  (CDCl<sub>3</sub>, 300 MHz) NMR of **3**

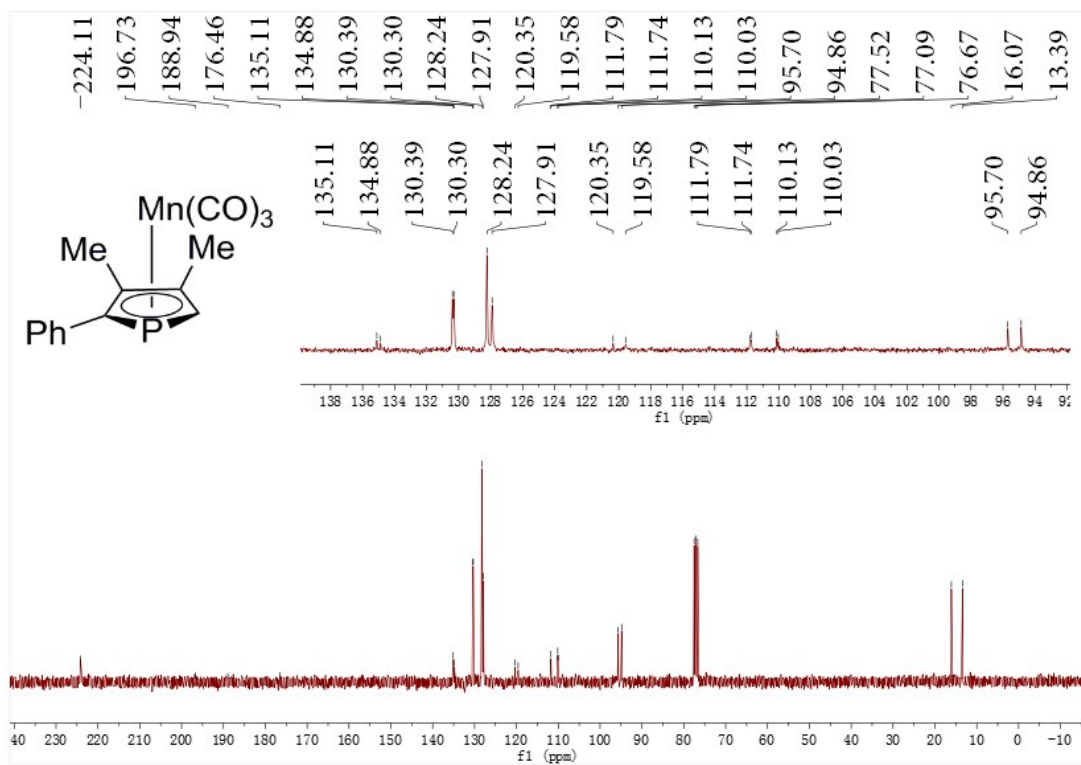

$^{13}\text{C}\{^1\text{H}\}$  (CDCl<sub>3</sub>, 75 MHz) NMR of **3**

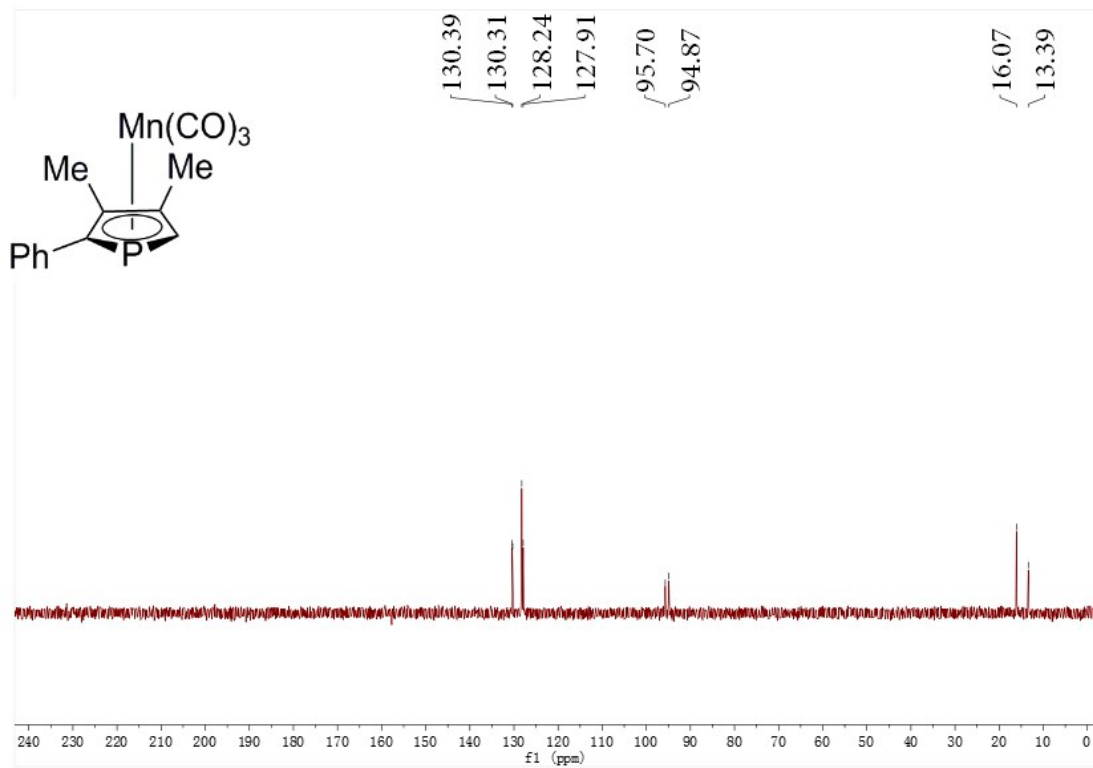

DEPT135 (CDCl<sub>3</sub>, 75 MHz) NMR of Complex **3**



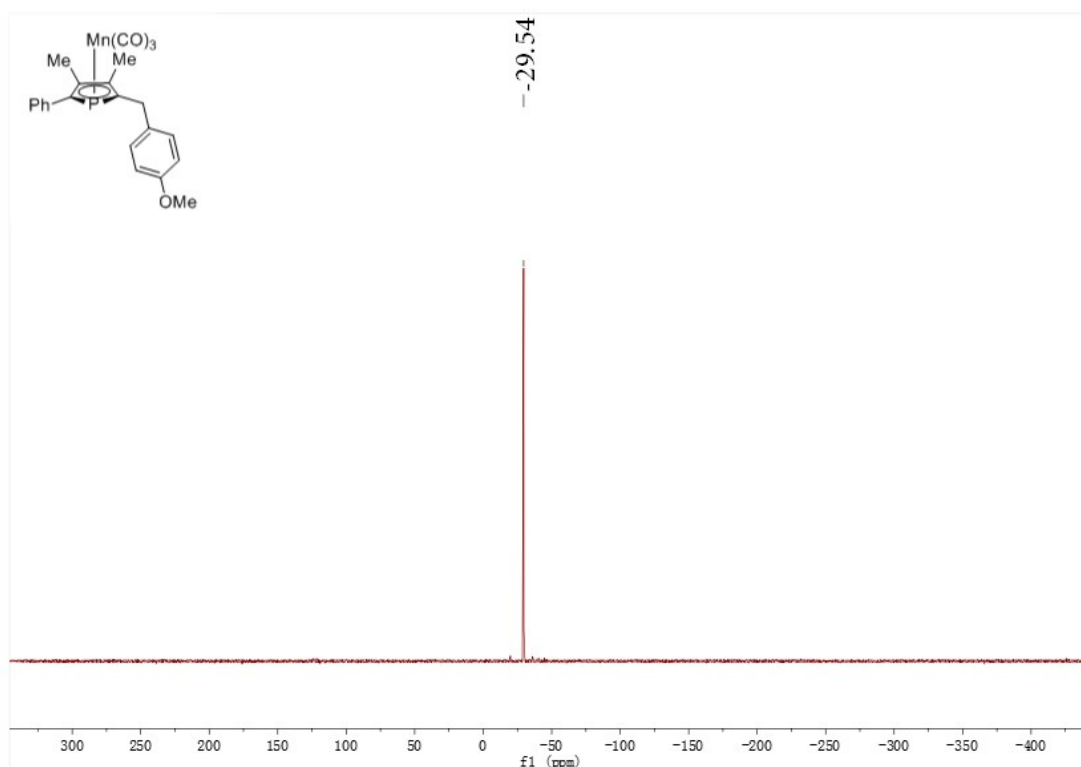

$^{31}\text{P}$  { $^1\text{H}$ } (CDCl<sub>3</sub>, 121 MHz) NMR of **4a**

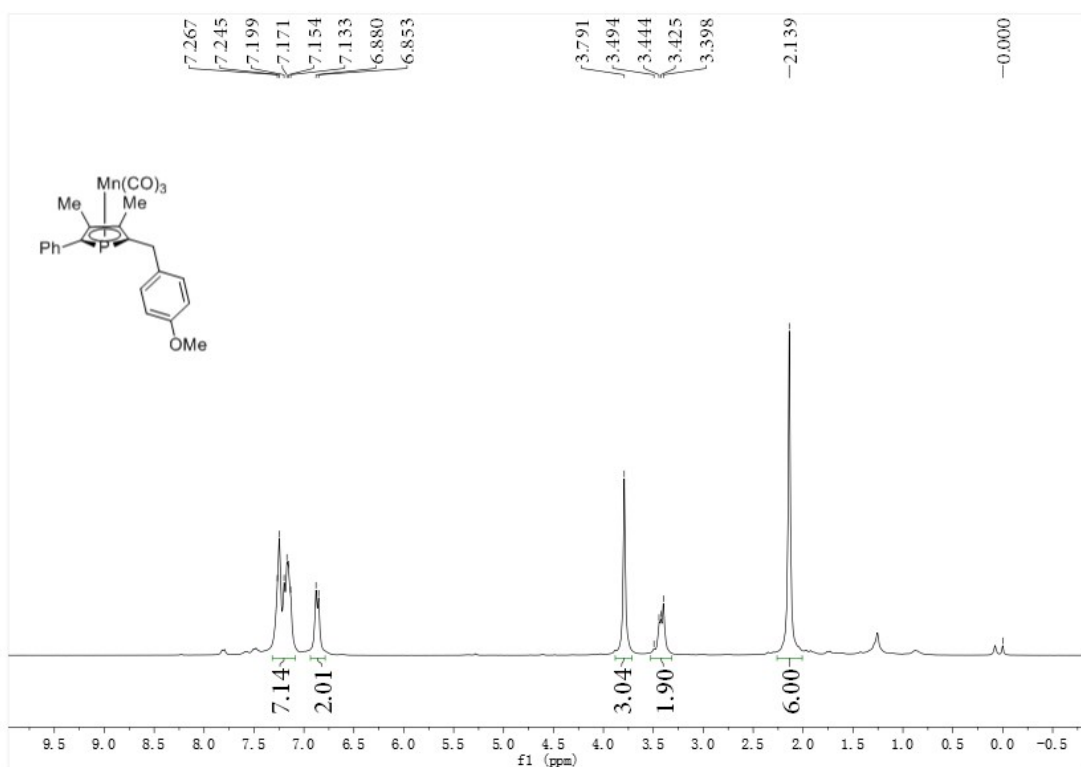

$^1\text{H}$  (CDCl<sub>3</sub>, 300 MHz) NMR of **4a**

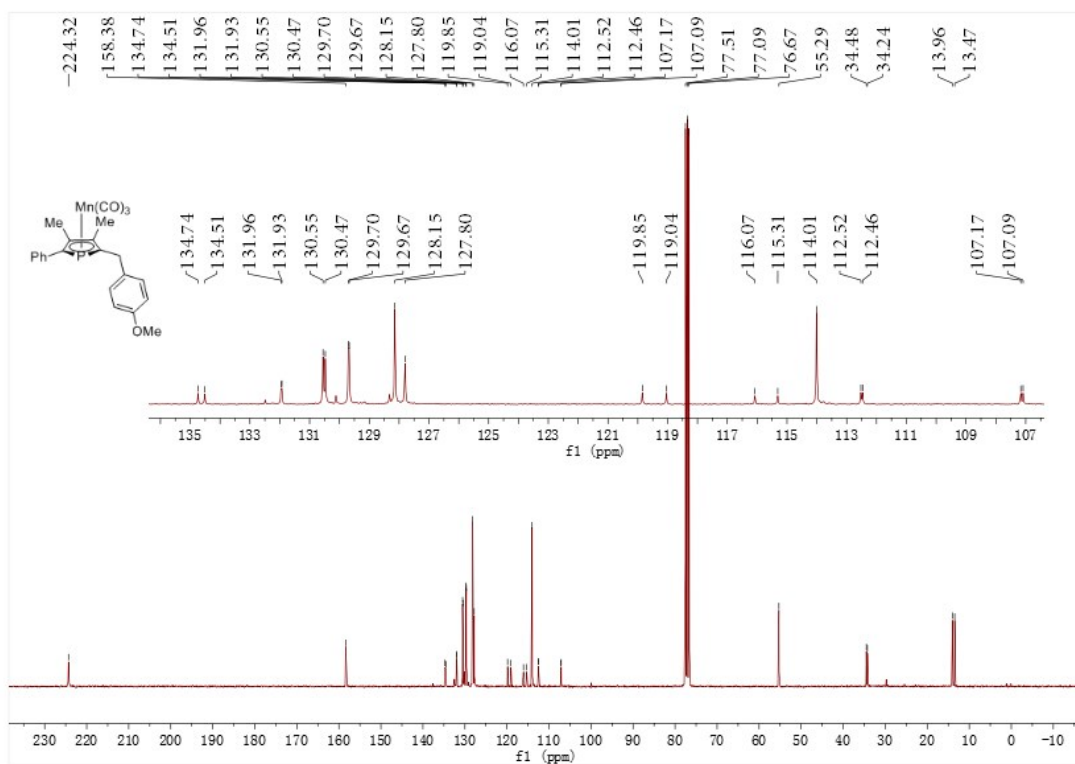

$^{13}\text{C}\{^1\text{H}\}$  ( $\text{CDCl}_3$ , 75 MHz) NMR of **4a**

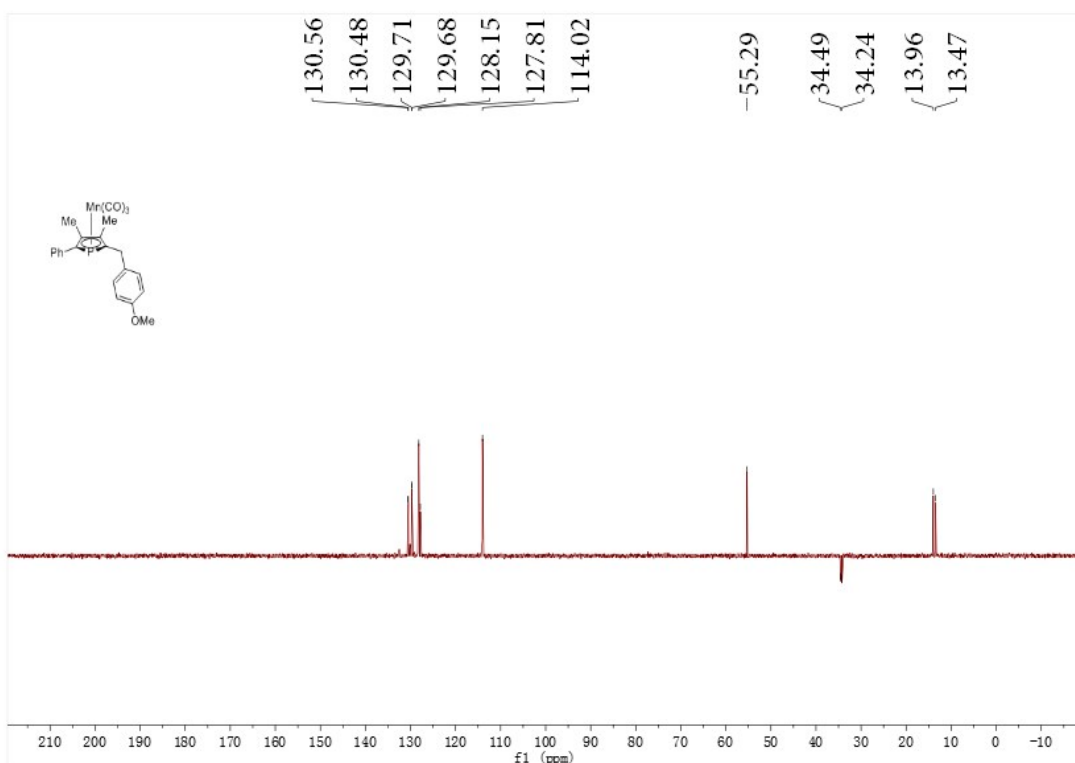

DEPT135 ( $\text{CDCl}_3$ , 75 MHz) NMR of **4a**

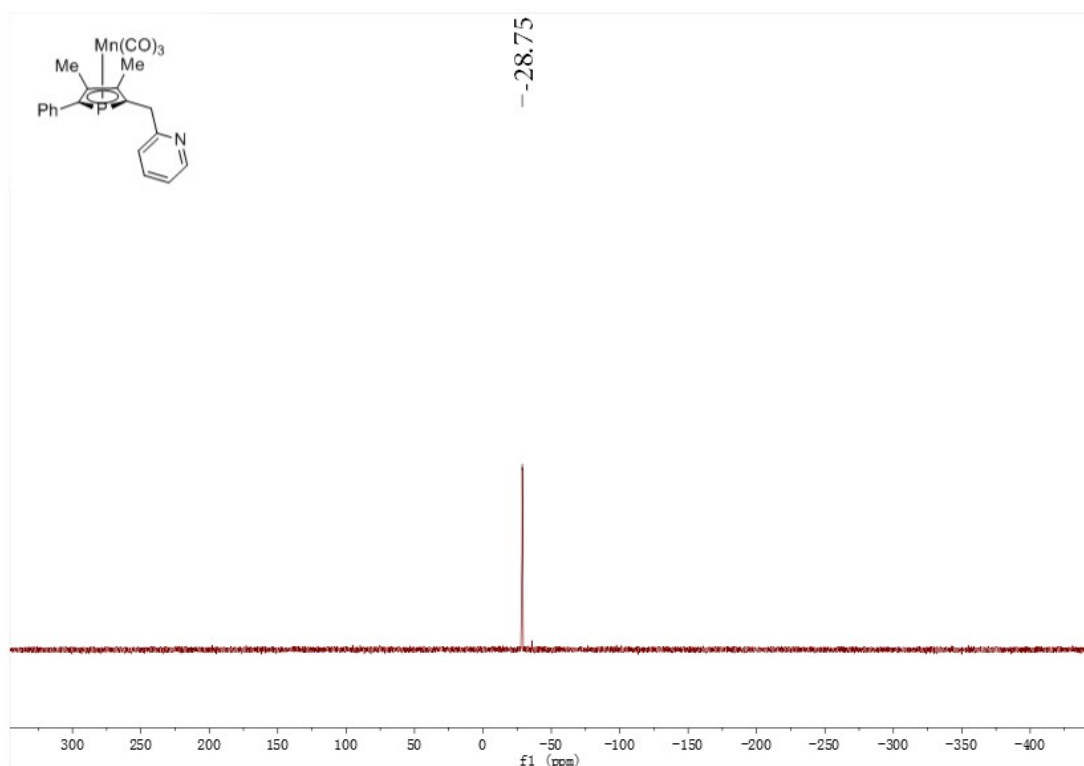

$^{31}\text{P}$  { $^1\text{H}$ } (CDCl<sub>3</sub>, 121 MHz) NMR of **4b**

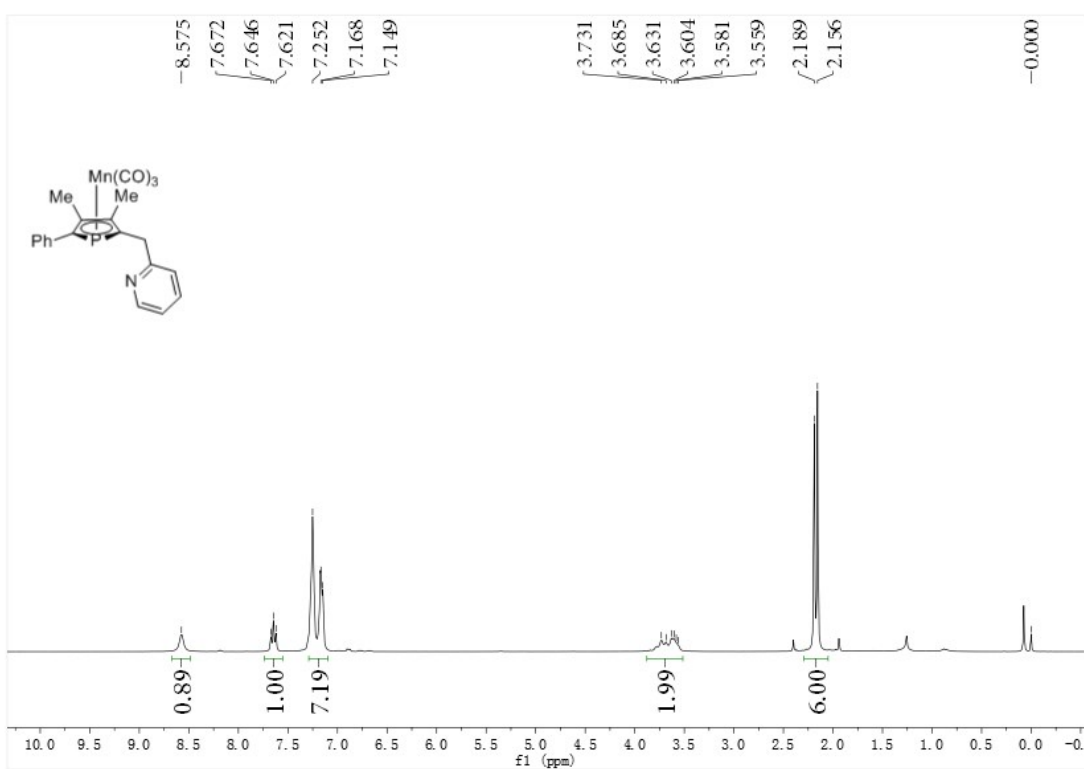

$^1\text{H}$  (CDCl<sub>3</sub>, 300 MHz) NMR of **4b**

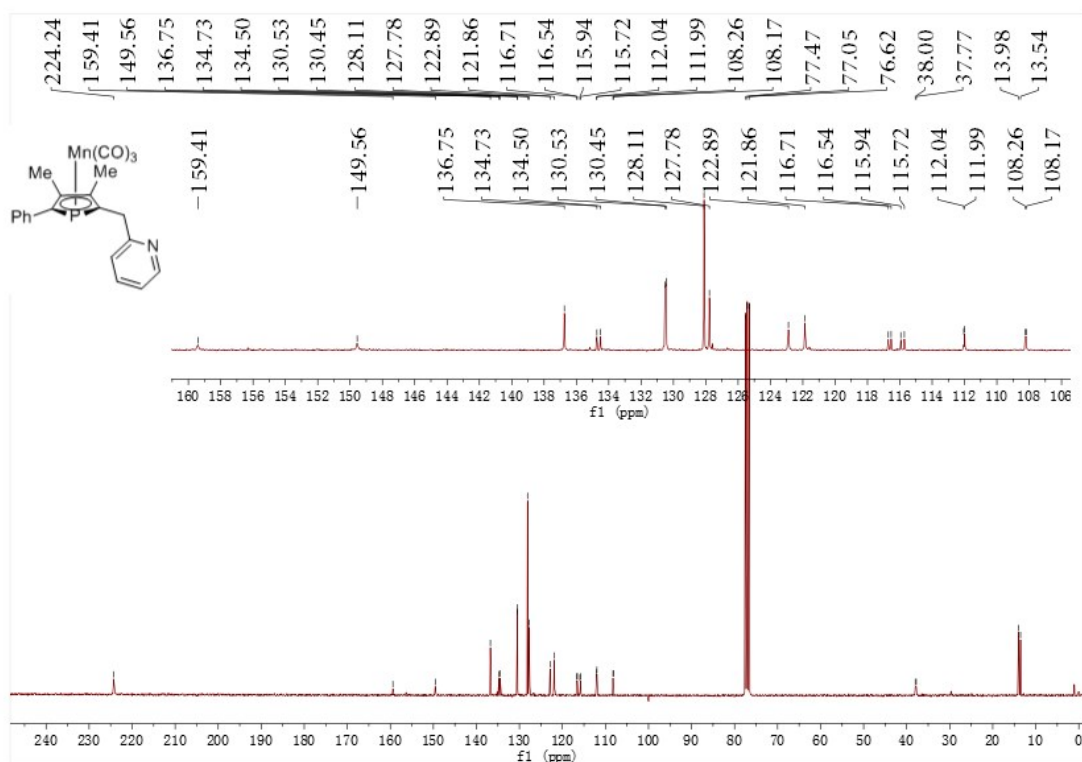

$^{13}\text{C}\{^1\text{H}\}$  (CDCl<sub>3</sub>, 75 MHz) NMR of **4b**

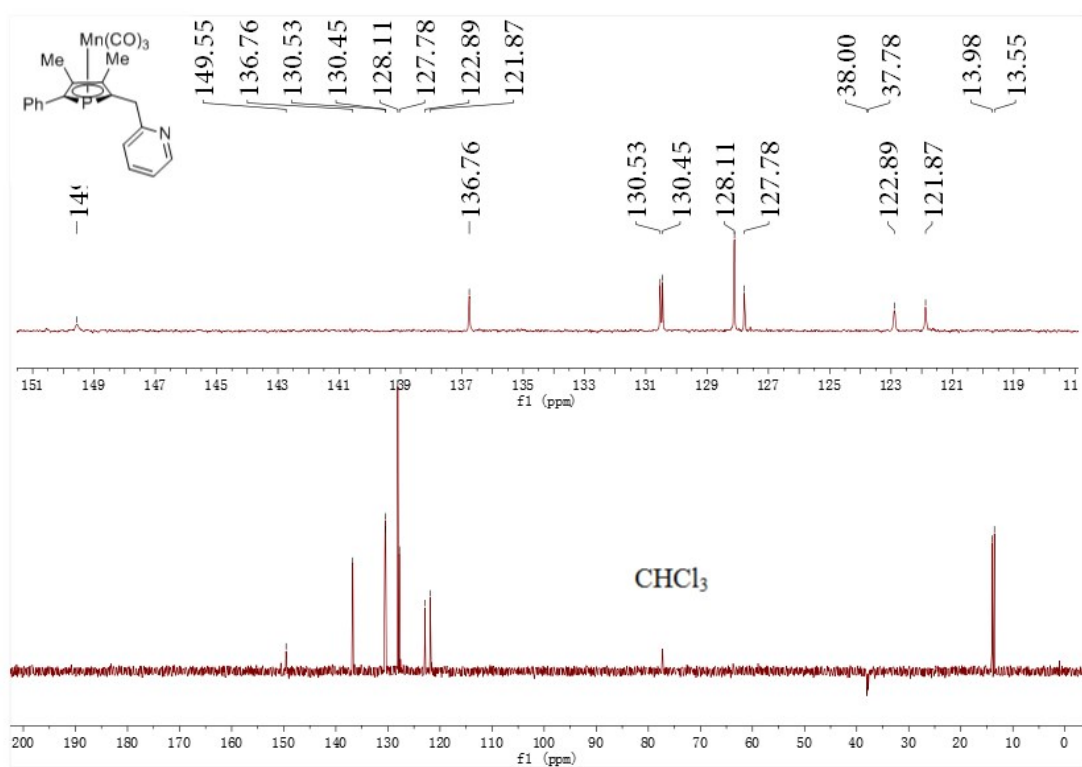

DEPT135 (CDCl<sub>3</sub>, 75 MHz) NMR of **4b**

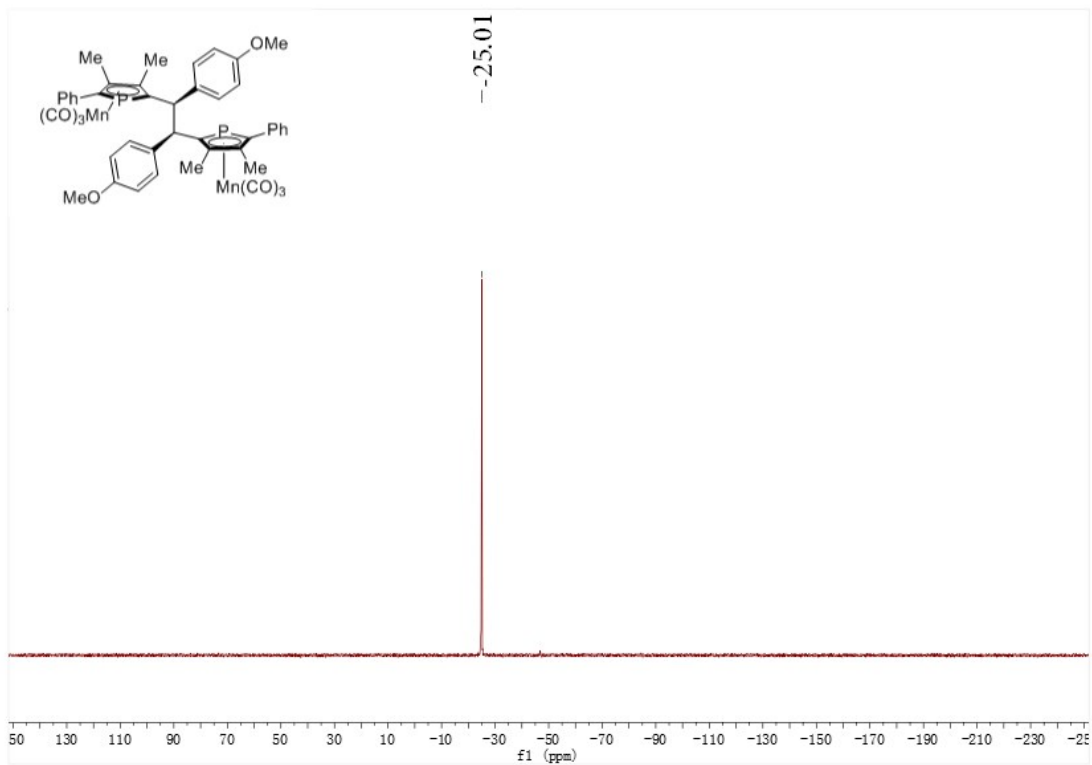

$^{31}\text{P}$   $\{^1\text{H}\}$  ( $\text{CDCl}_3$ , 121 MHz) NMR of **5a**

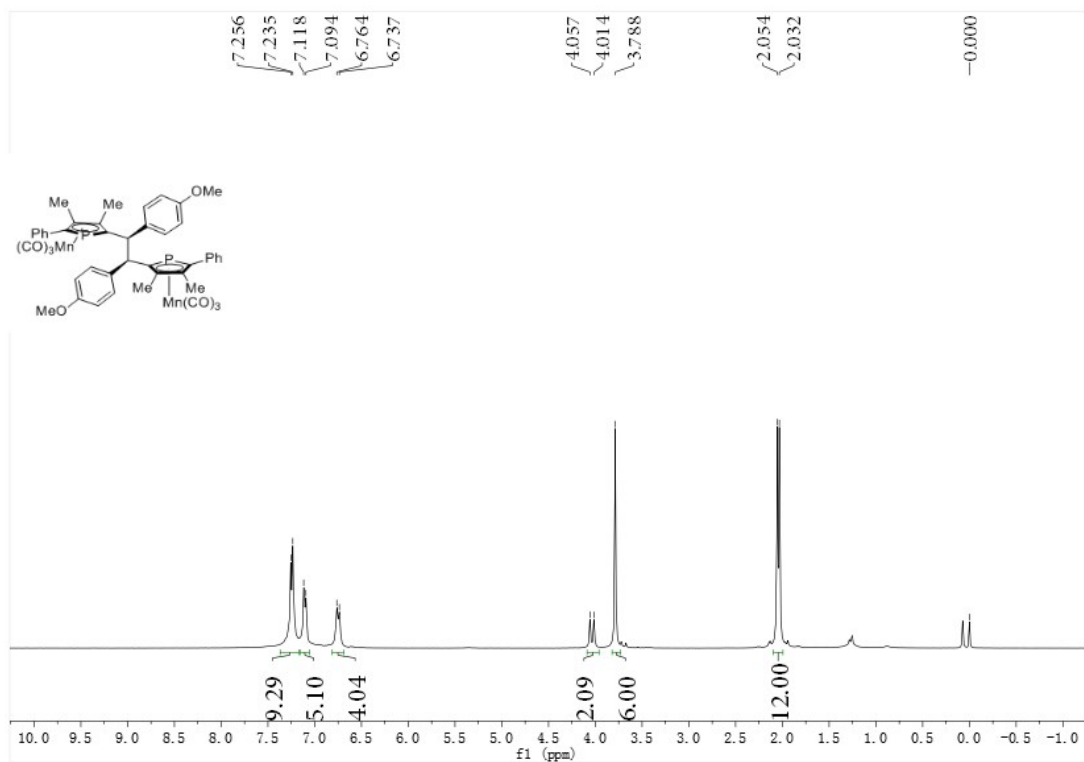

$^1\text{H}$  ( $\text{CDCl}_3$ , 300 MHz) NMR of **5a**

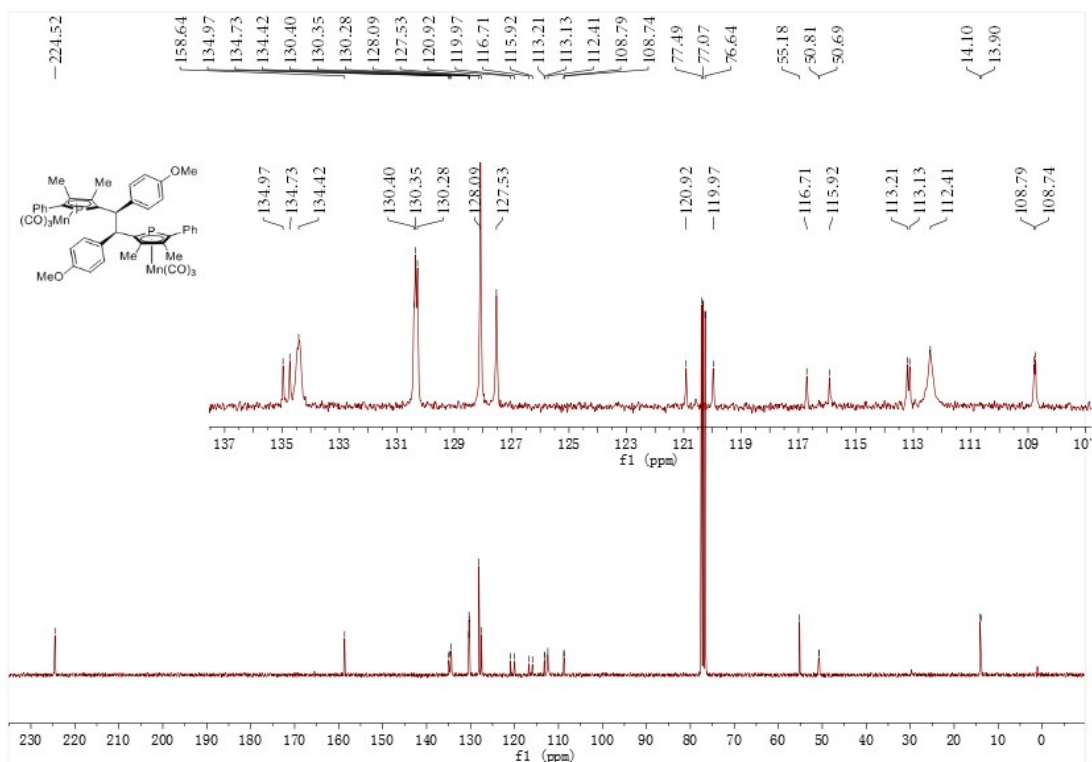

$^{13}\text{C}\{^1\text{H}\}$  (CDCl<sub>3</sub>, 75 MHz) NMR of **5a**

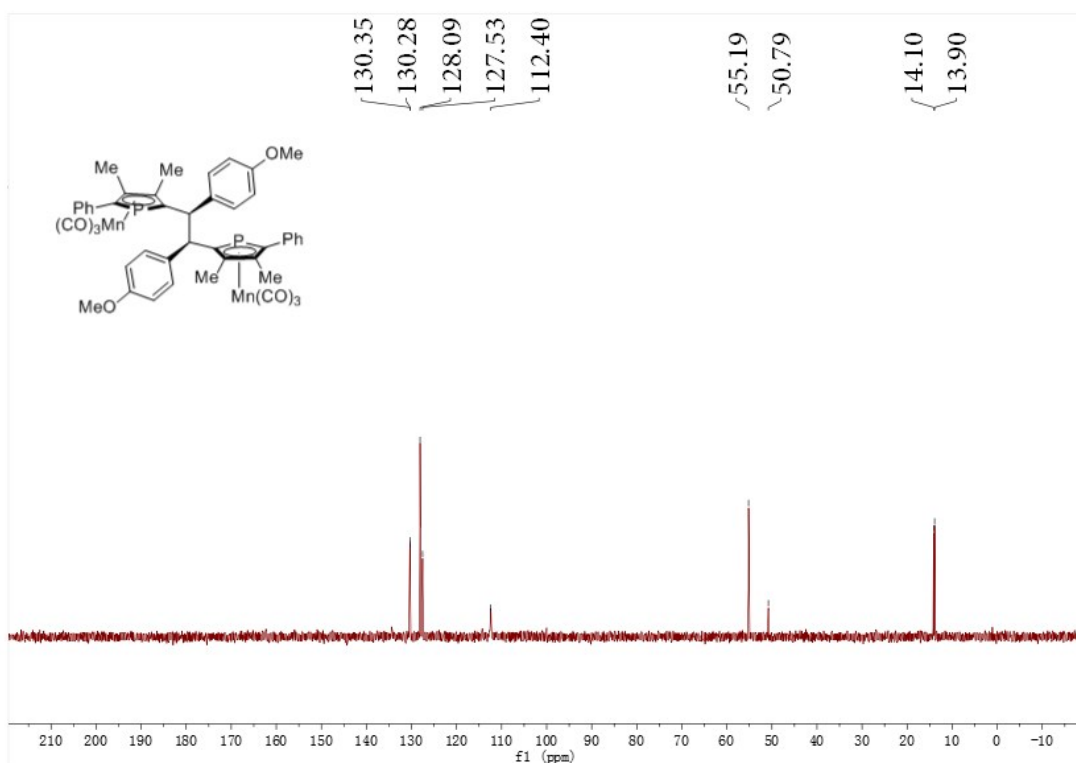

DEPT-135 (CDCl<sub>3</sub>, 75 MHz) NMR of **5a**

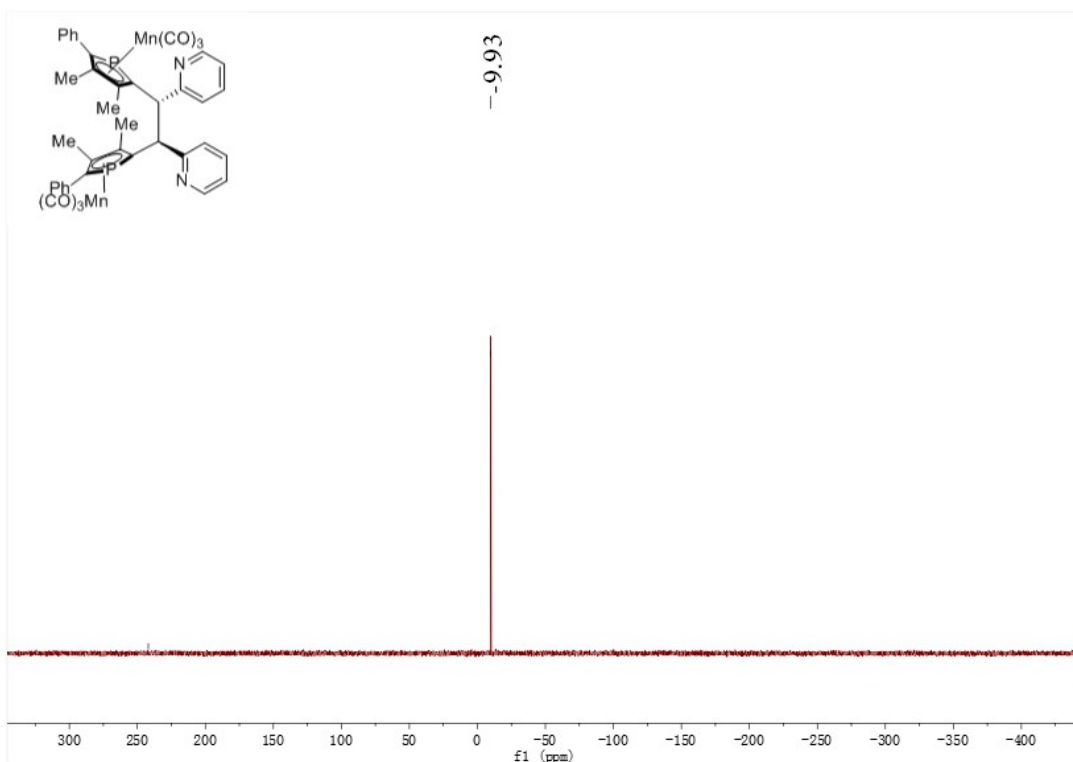

$^{31}\text{P}\{^1\text{H}\}$  ( $\text{CDCl}_3$ , 121 MHz) NMR of **5b**

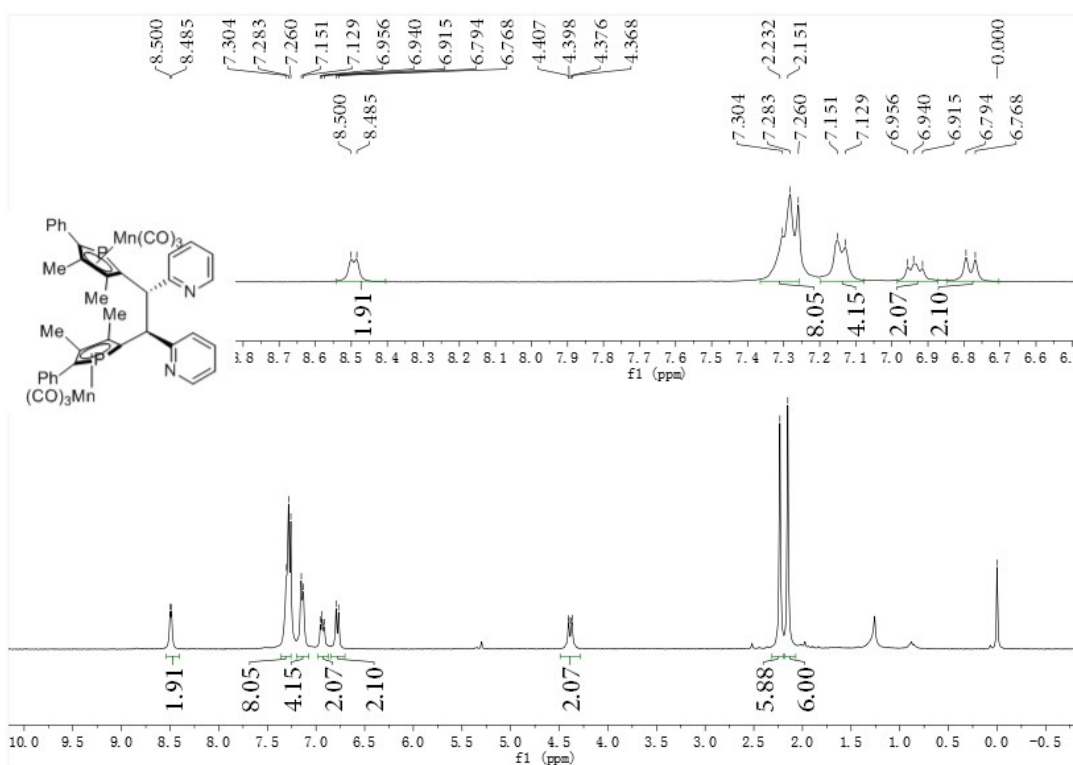

$^1\text{H}$  ( $\text{CDCl}_3$ , 300 MHz) NMR of **5b**

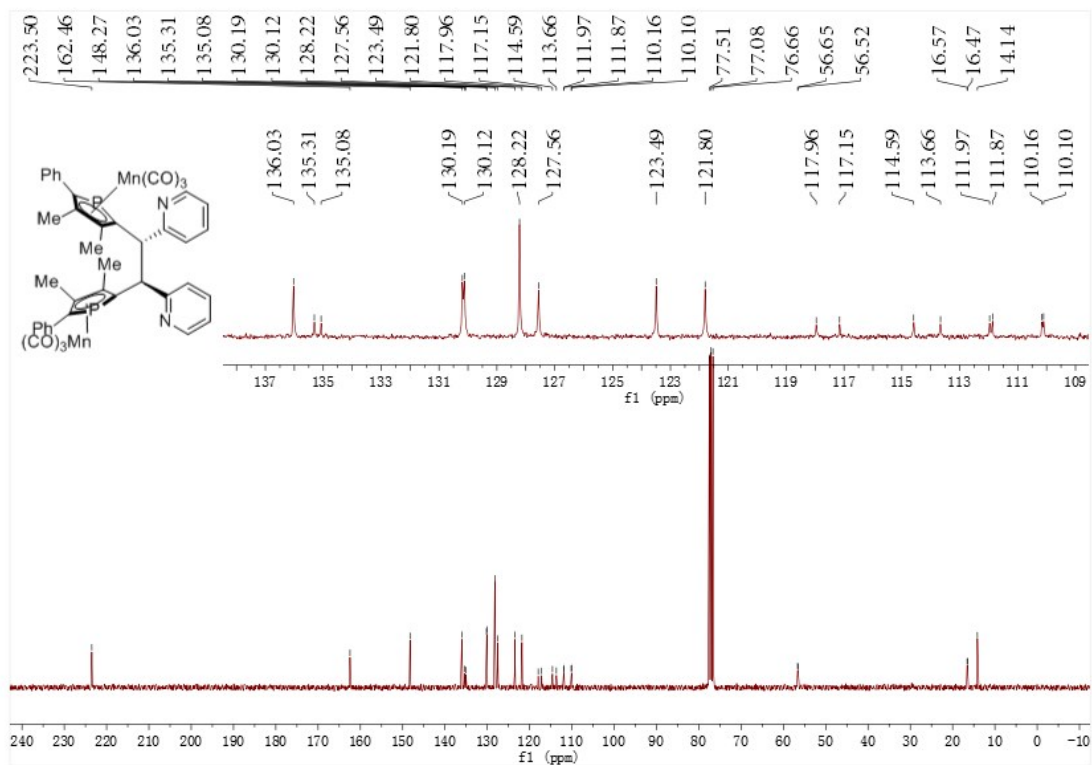

$^{13}\text{C}\{^1\text{H}\}$  ( $\text{CDCl}_3$ , 75 MHz) NMR of **5b**

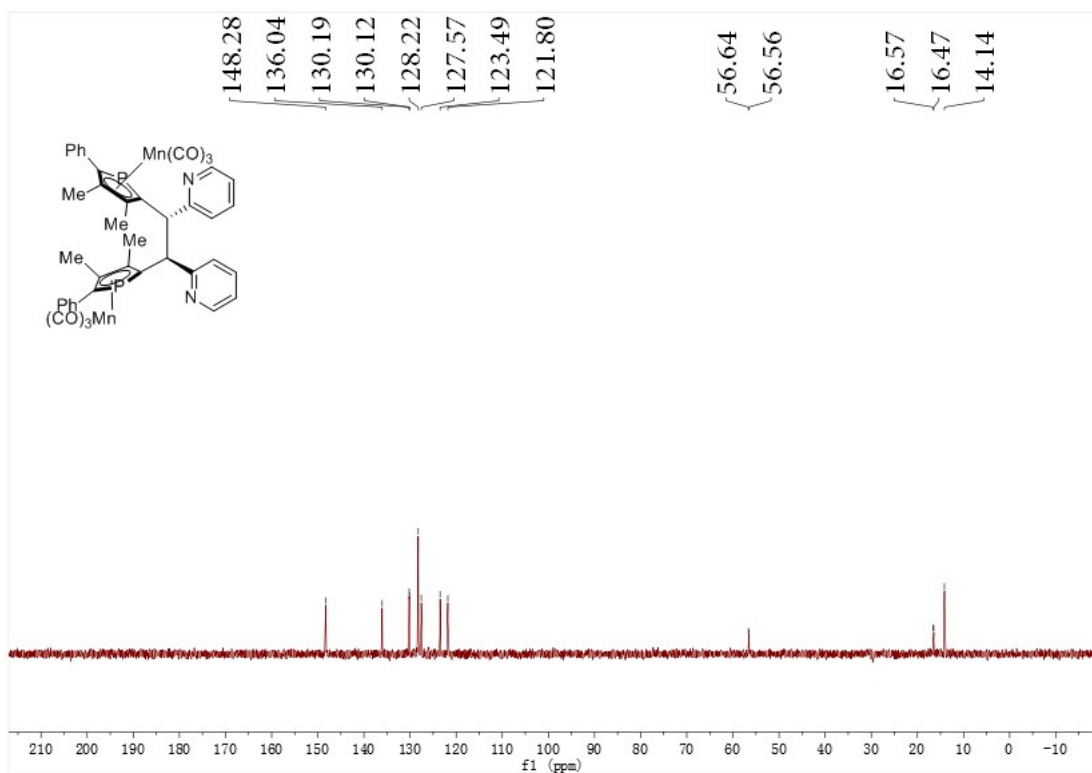

DEPT135 ( $\text{CDCl}_3$ , 75 MHz) NMR of **5b**



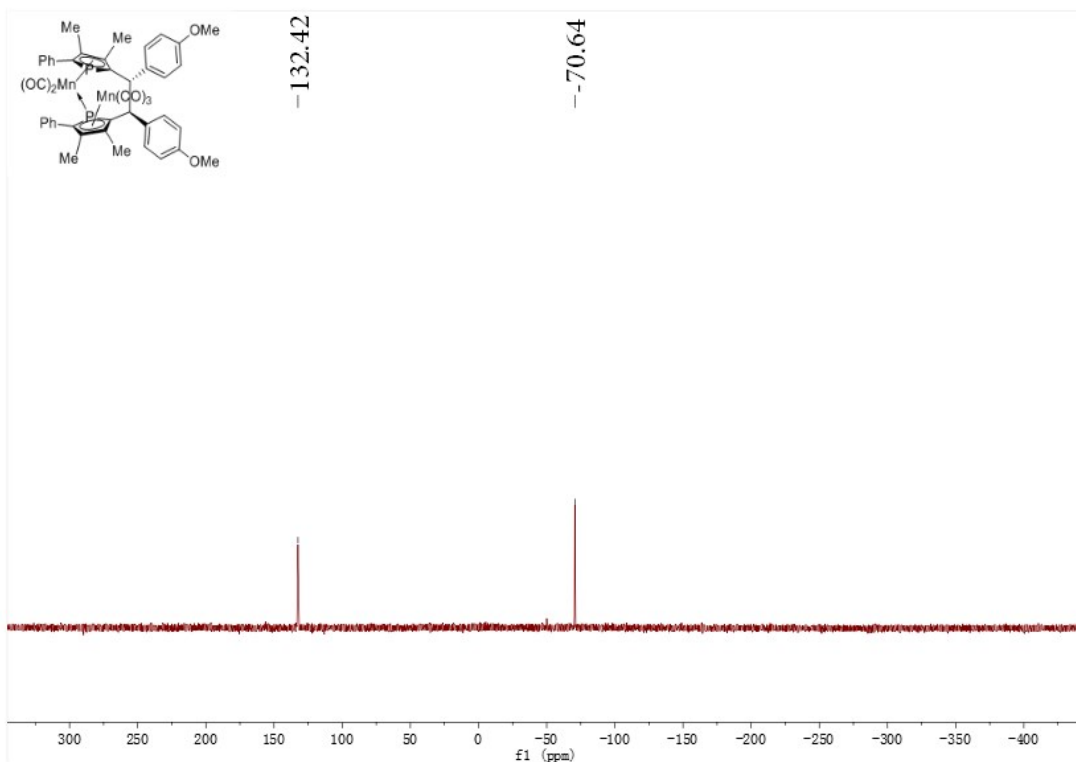

$^{31}\text{P}$   $\{^1\text{H}\}$  ( $\text{CDCl}_3$ , 121 MHz) NMR of **7a**

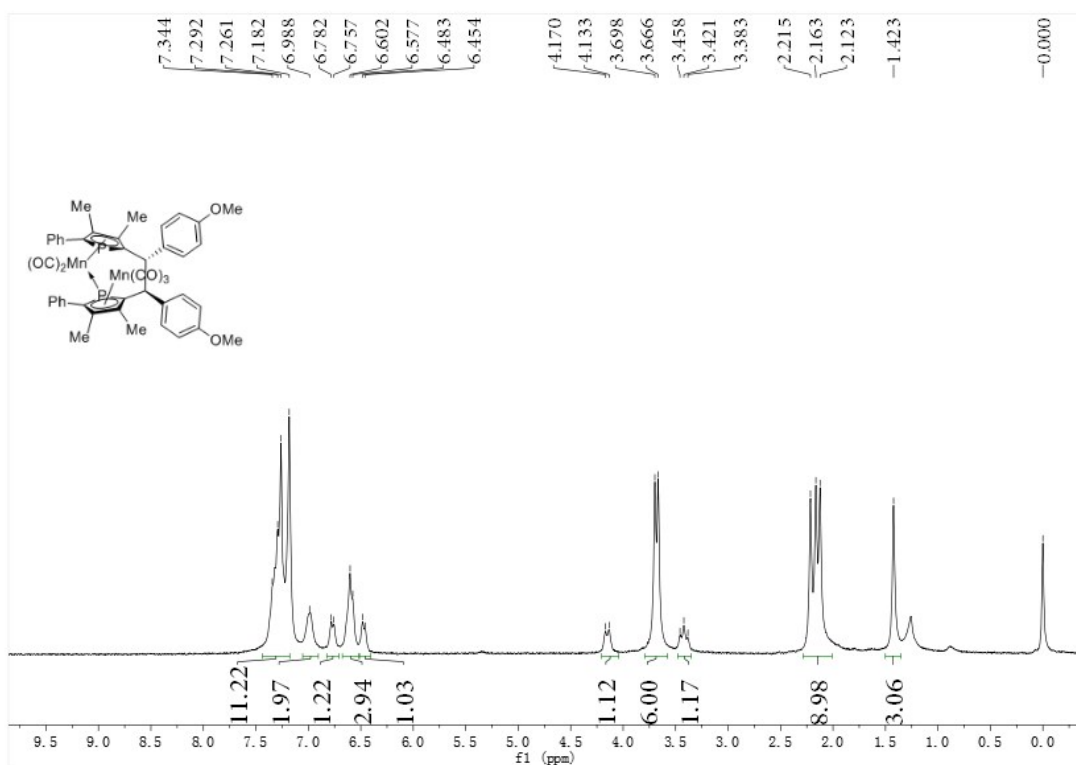

$^1\text{H}$  ( $\text{CDCl}_3$ , 300 MHz) NMR of **7a**

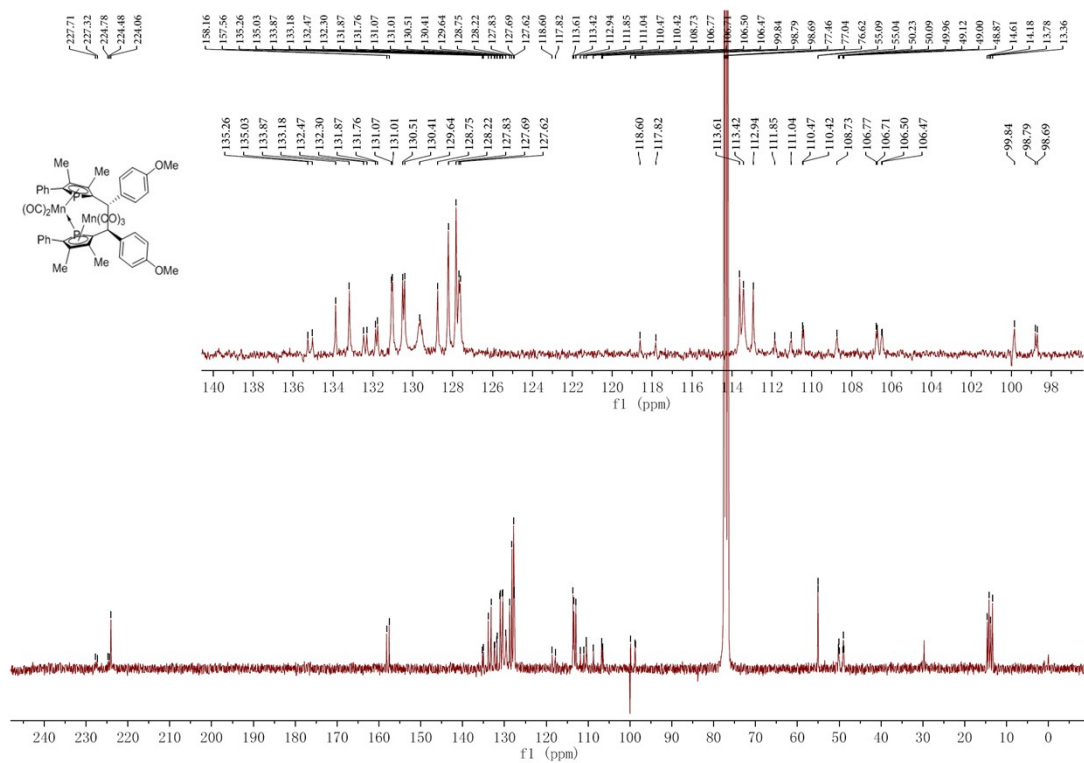

**$^{13}\text{C}\{^1\text{H}\}$  (CDCl<sub>3</sub>, 75 MHz) NMR of Complex **7a****

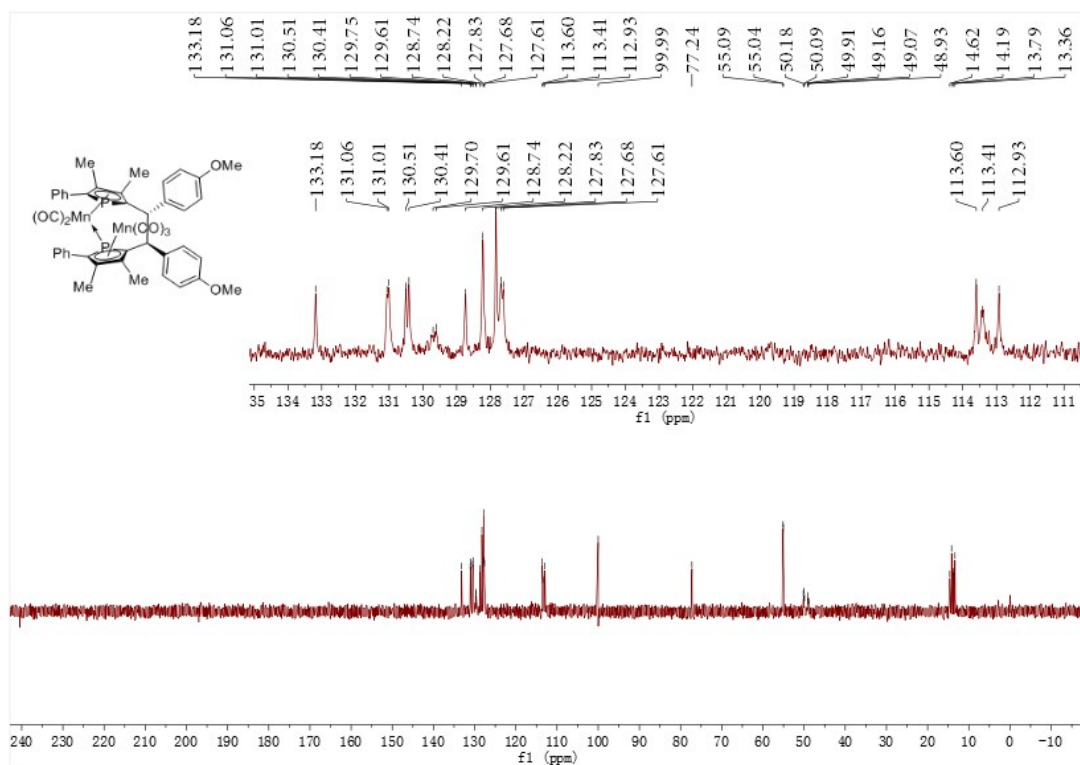

**Dept135 (CDCl<sub>3</sub>, 75 MHz) NMR of **7a****

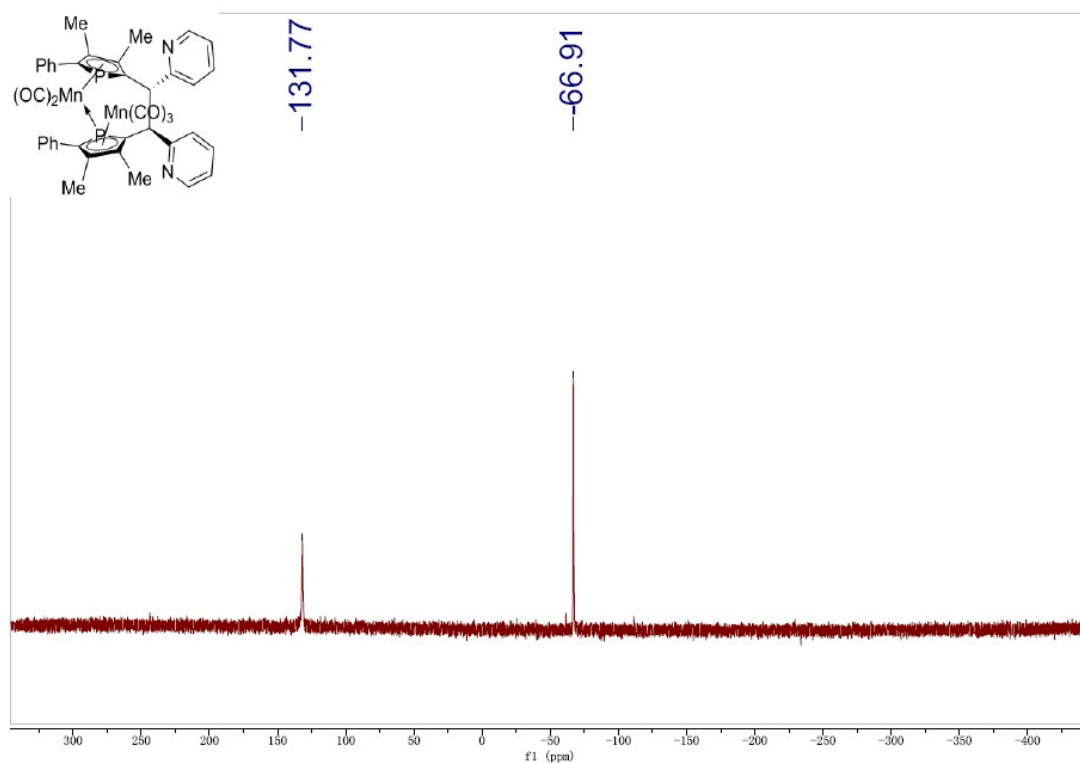

$^{31}\text{P}$  { $^1\text{H}$ } (CDCl<sub>3</sub>, 121 MHz) NMR of **7b**

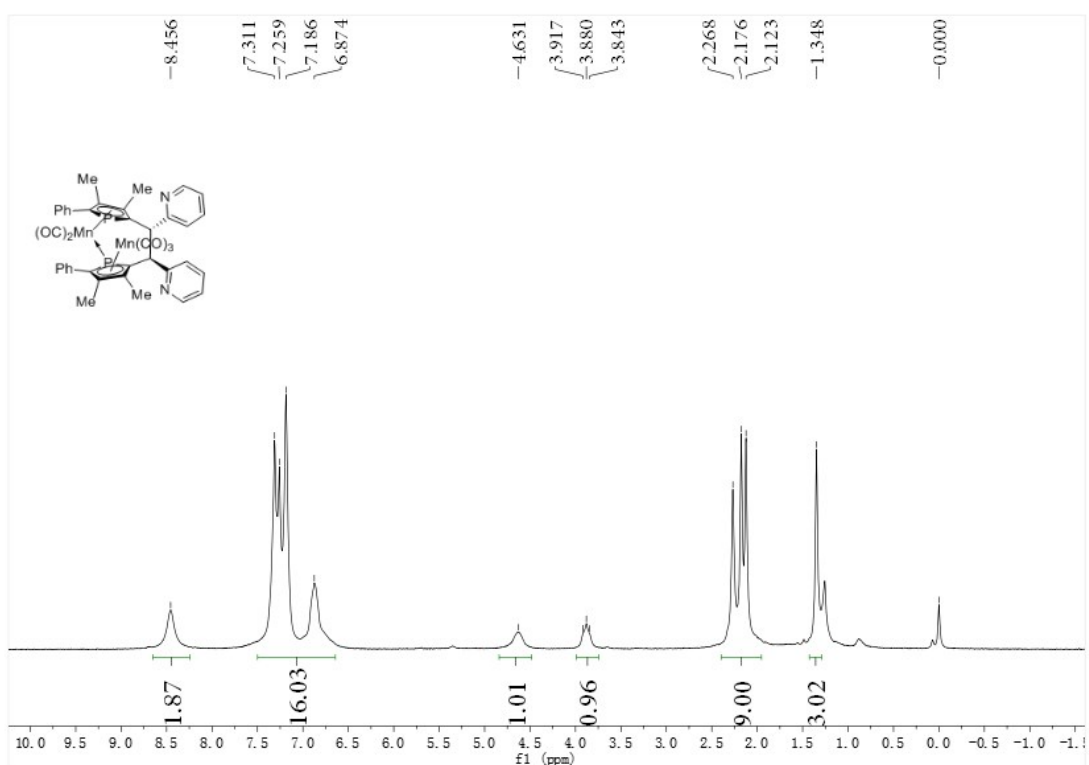

$^1\text{H}$  (CDCl<sub>3</sub>, 300 MHz) NMR of **7b**

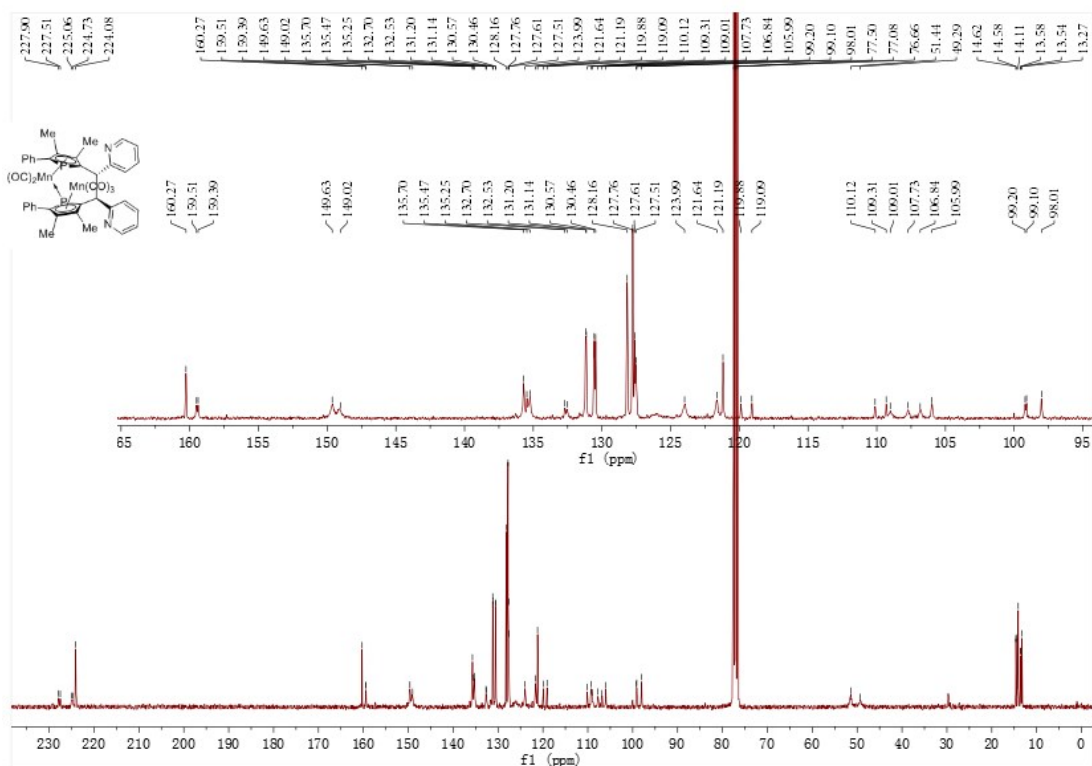

$^{13}\text{C}\{^1\text{H}\}$  ( $\text{CDCl}_3$ , 75 MHz) NMR of **7b**

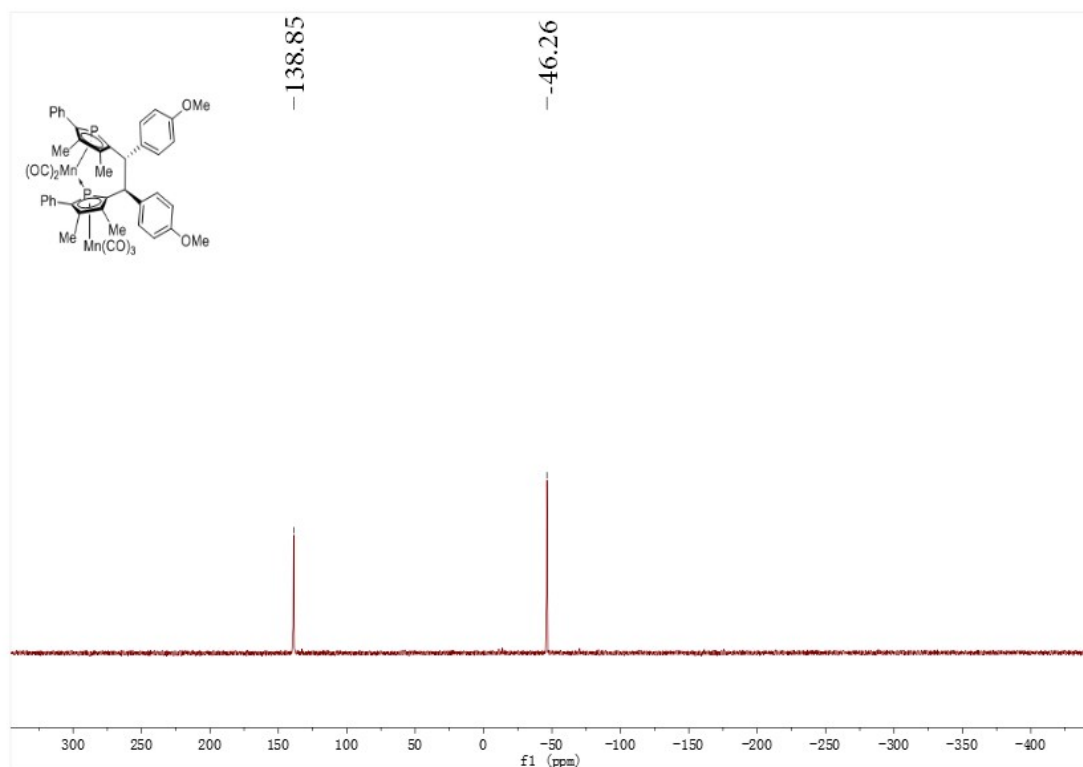

$^{31}\text{P}\{^1\text{H}\}$  ( $\text{CDCl}_3$ , 121 MHz) NMR of **8a**

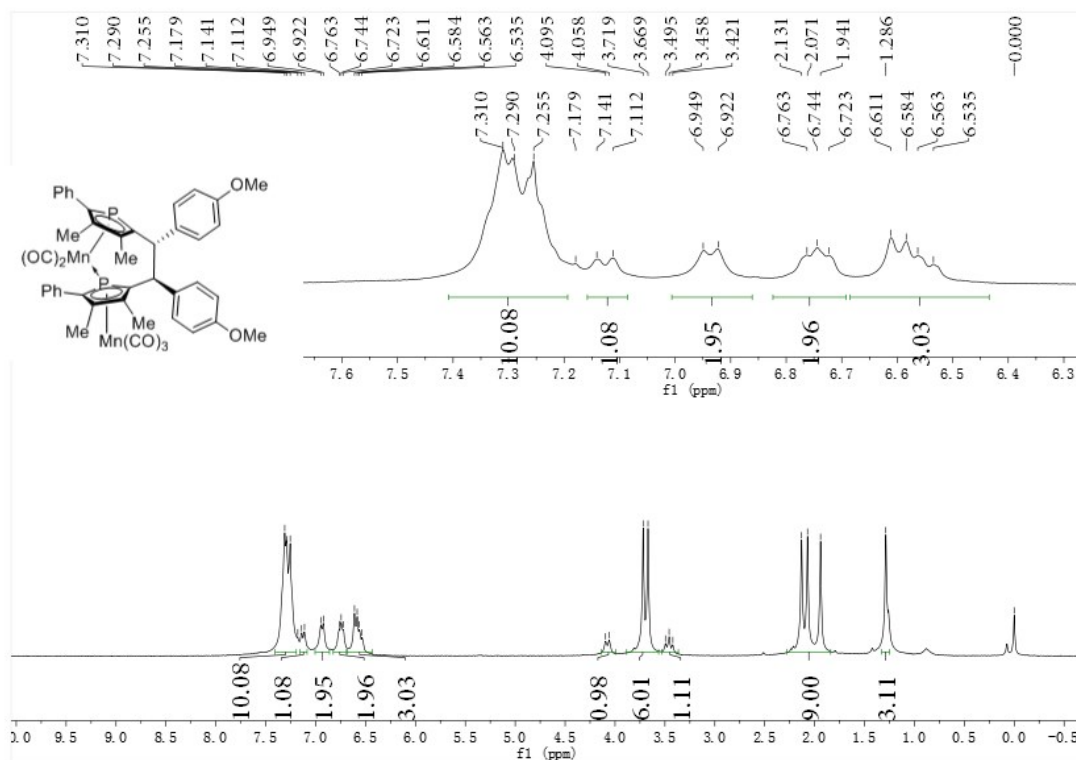

<sup>1</sup>H (CDCl<sub>3</sub>, 300 MHz) NMR of **8a**

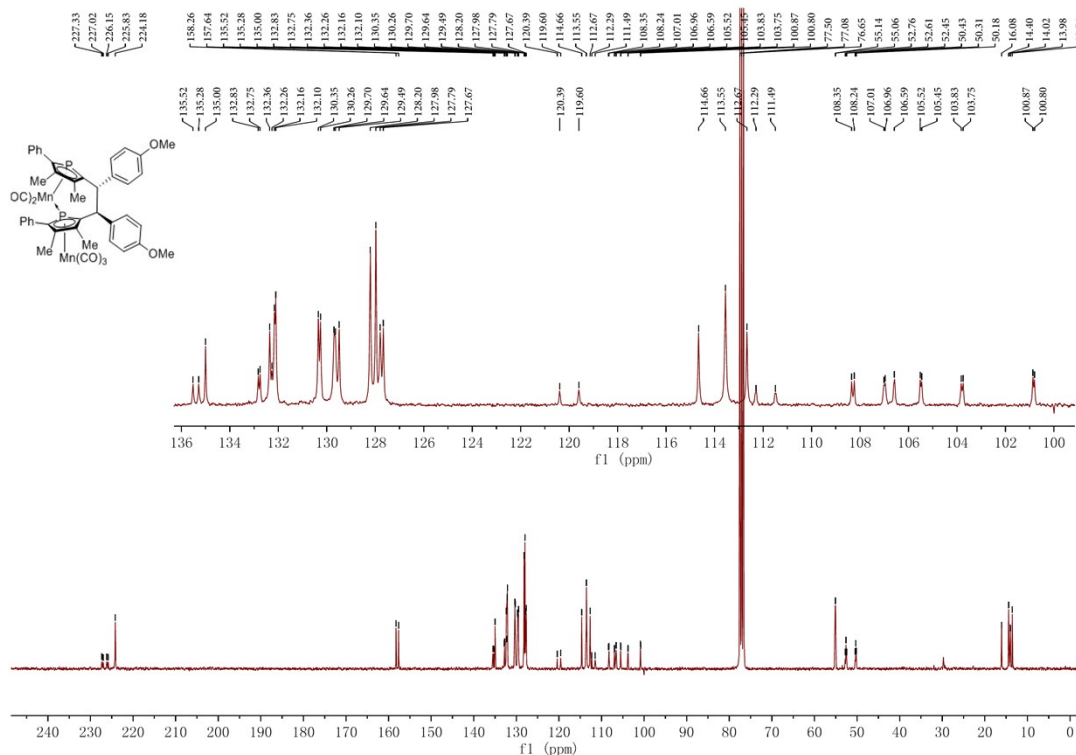

<sup>13</sup>C {<sup>1</sup>H} (CDCl<sub>3</sub>, 75 MHz) NMR of **8a**

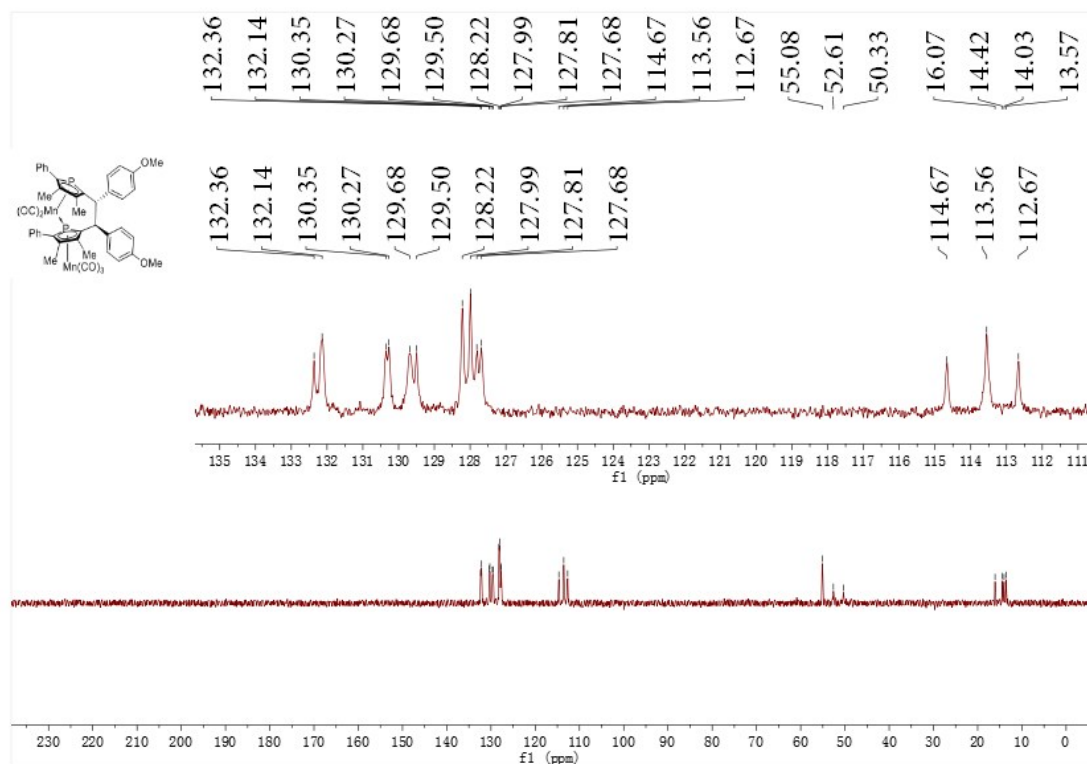

Dept135 (CDCl<sub>3</sub>, 75 MHz) NMR of **8a**

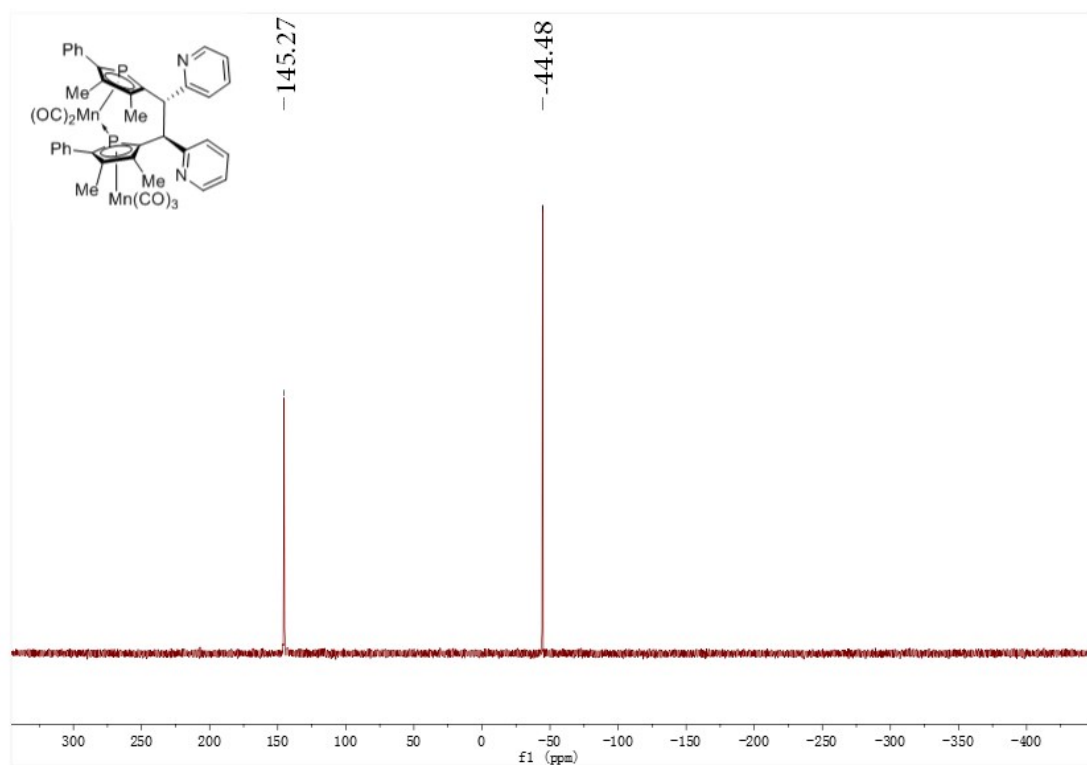

<sup>31</sup>P (CDCl<sub>3</sub>, 121 MHz) NMR of **8b**

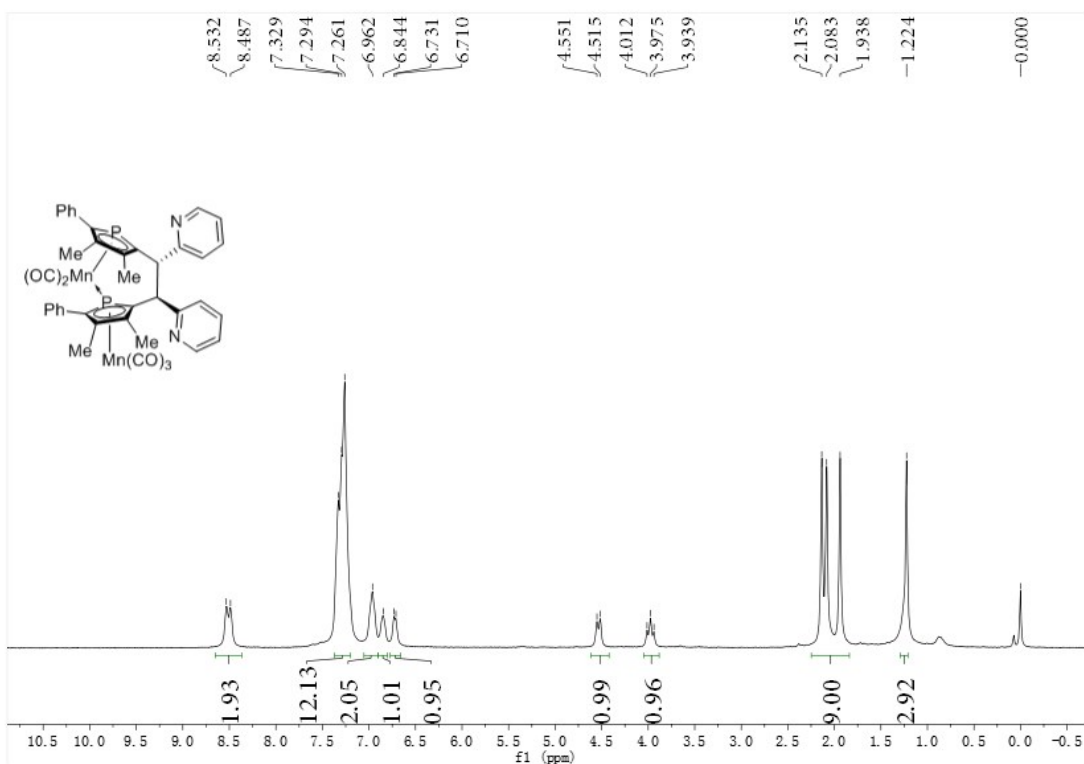

$^1\text{H}$  (CDCl<sub>3</sub>, 300 MHz) NMR of **8b**

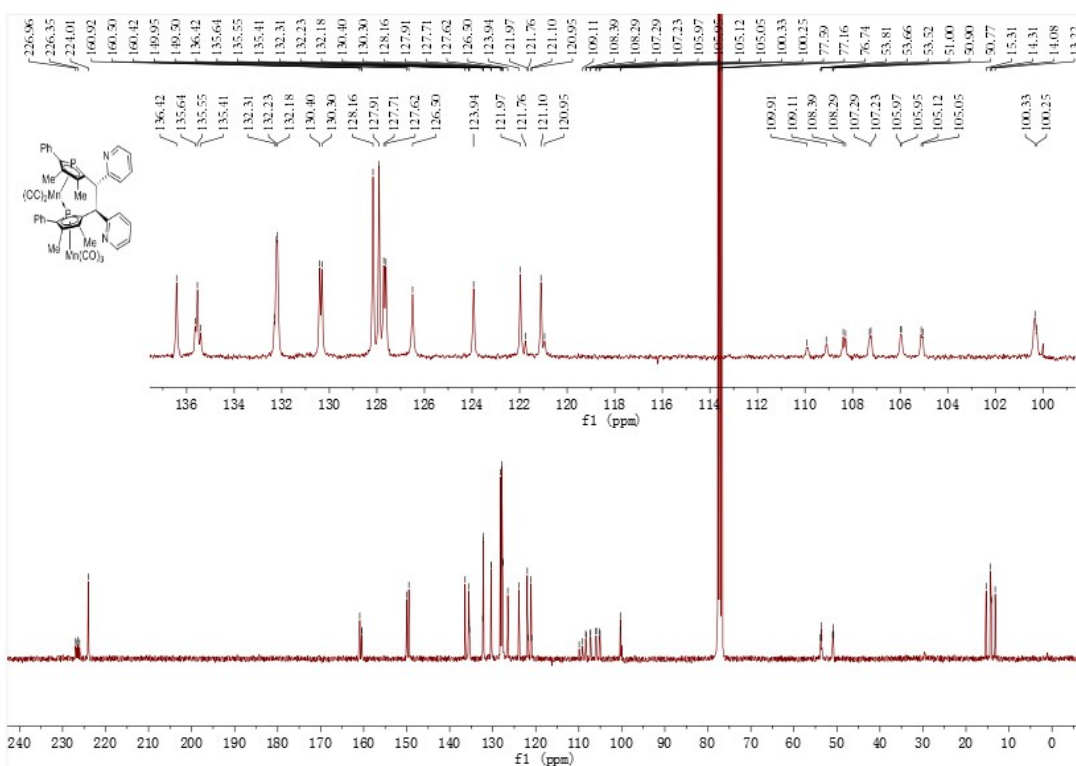

$^{13}\text{C}\{^1\text{H}\}$  (CDCl<sub>3</sub>, 75 MHz) NMR of **8b**

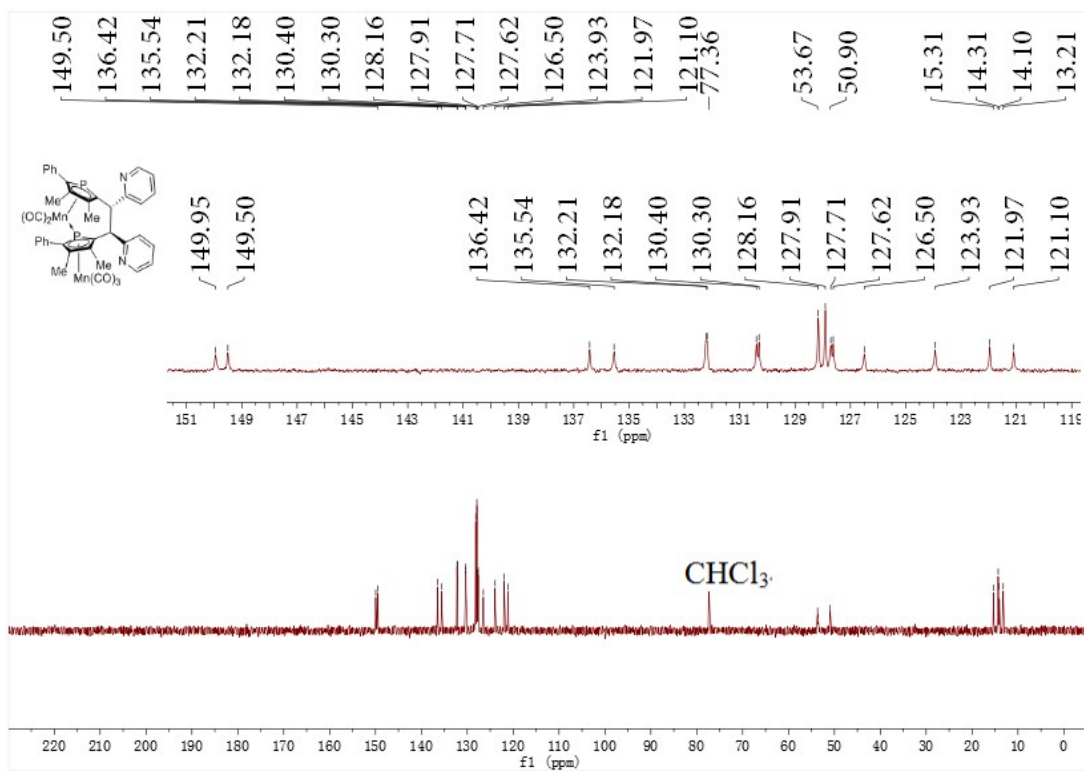

Dept135 (CDCl<sub>3</sub>, 75 MHz) NMR of **8b**
